# Supplementary material for: Dicopper(i) complexes of a binucleating, dianionic, naphthyridine bis(amide) ligand
Source: Royal Society of Chemistry journal article supplement (doi:10.1039/d5dt00034c), 2025-01-01
Supplement: d5dt00034c1.pdf [file d5dt00034c1.pdf]

## Supporting Information

### Dicopper(I) Complexes of a Binucleating, Dianionic, Naphthyridine Bis(amide) Ligand

Laurent Sévery,<sup>1,2</sup> T. Alexander Wheeler,<sup>1,2</sup> Amelie Nicolay,<sup>1</sup> Simon J. Teat,<sup>3</sup> and T. Don Tilley<sup>1,2\*</sup>

<sup>1</sup>Department of Chemistry, University of California, Berkeley, Berkeley, CA 94720-1460, USA

<sup>2</sup>Chemical Sciences Division, Lawrence Berkeley National Laboratory, Berkeley, CA 94720, USA

<sup>3</sup>Advanced Light Source, Lawrence Berkeley National Laboratory, Berkeley, CA 94720, USA

### Table of Content

|                                        |    |
|----------------------------------------|----|
| Experimental .....                     | 2  |
| General experimental details .....     | 2  |
| Electrochemistry.....                  | 2  |
| Single crystal X-ray diffraction ..... | 2  |
| Computational Details .....            | 3  |
| Syntheses.....                         | 3  |
| Supplementary Figures and Tables.....  | 6  |
| NMR spectra .....                      | 11 |
| Solid-state molecular structures.....  | 19 |
| References .....                       | 27 |

## Experimental

### General experimental details

All experiments were performed using standard Schlenk techniques or in an N<sub>2</sub>-filled glovebox unless otherwise noted. Pentane, THF, toluene and diethyl ether for experiments inside the nitrogen-filled (6N) glovebox were dried and deaerated using a JC Meyers Phoenix SDS solvent purification system. Dichloromethane-*d*<sub>2</sub> and benzene-*d*<sub>6</sub> were dried and stored over activated 3 Å molecular sieves for at least 48 hours and degassed with three freeze-pump-thaw cycles. The compound 7-dichloro-1,8-naphthyridine was prepared according to the reported method.<sup>1</sup> Mesitylcopper(I) was prepared according to the procedure by Tsuda, et al.<sup>2</sup> All other reagents were obtained from commercial sources.

NMR spectra were acquired at 299 K using Bruker AV-400, AV-500 and AV-600 spectrometers. <sup>1</sup>H NMR spectra were referenced via residual monoprotonic solvent peaks ( $\delta$  5.32 for dichloromethane-*d*<sub>2</sub>,  $\delta$  7.16 for benzene-*d*<sub>6</sub>, 1.72 for THF-*d*<sub>8</sub>), while <sup>13</sup>C{<sup>1</sup>H} NMR spectra were referenced to solvent resonances ( $\delta$  128.06 for benzene-*d*<sub>6</sub>,  $\delta$  53.84 for dichloromethane-*d*<sub>2</sub>,  $\delta$  67.21 for THF-*d*<sub>8</sub>). Elemental analyses were performed by Elena Kramer at the Microanalytical Facility at the University of California, Berkeley. IR Spectra were recorded on a Bruker Vertex 80 FTIR spectrometer in ATR mode with a resolution of 4 cm<sup>-1</sup>.

### Electrochemistry

Electrochemical experiments were performed inside a nitrogen glovebox using a BASi EC Epsilon galvanostat. Glassy carbon working electrodes (3 mm diameter of active material) were polished with alumina (1.0  $\mu$ m, 0.3  $\mu$ m and 0.05  $\mu$ m), rinsed with milliQ-grade water and high purity acetone before being transferred into the glovebox. The counter electrode consisted of a platinum wire that was cleaned in a torch flame before being rinsed with milliQ-grade water and high purity acetone and dried under nitrogen before transfer into the glovebox. The reference electrode consisted of a silver wire etched in 1M HCl in a reservoir of electrolyte solution and 0.5 mM silver tetrafluoroborate (99.999%), separated by a porous glass frit and assembled the glovebox. The electrolyte solution (Bu<sub>4</sub>NPF<sub>6</sub>, electrochemical grade, 0.1 M in THF) was prepared immediately before measurement. The reference electrode was calibrated by measurement of the ferrocene redox couple in electrolyte solution at regular intervals to ensure no drifting of the potential. Cyclic voltammograms were measured by scanning in the positive direction (unless otherwise noted) after an equilibration period of two seconds and blank measurements were performed before addition of the substrates.

### Single crystal X-ray diffraction

Single crystal X-ray diffraction for complex **4** was performed at UC Berkeley CheXRay crystallographic facility. Data collection was performed using a Rigaku XtaLAB P200 equipped with a MicroMax 007HF rotating anode and a Pilatus 200k hybrid pixel array detector using Mo K $\alpha$  radiation ( $\lambda$  = 0.71073 Å) monochromated by a graphite monochromator. All other diffraction studies were collected at the Advanced Light Source beamline 12.2.1 using a Bruker D85 three-circle diffractometer equipped with a PHOTON II CCD area detector using synchrotron radiation ( $\lambda$  = 0.7288 Å) monochromated using a double crystal Si(111) monochromator. Structure solution, modeling, and refining was performed using both the OLEX2<sup>3</sup> and Shelxle GUI<sup>4</sup> and SHELX<sup>5</sup> softwares while data integration was done using APEXIII<sup>6</sup> softwares.

## Computational Details

All Calculations were performed with the Gaussian16 (Revision B.01) package and visualized with GaussView 6.0 or Chemcraft Version 1.8. The geometries of all complexes were optimized in vacuum using the corresponding solid-state molecular structures as starting points, omitting counterions and any solvent molecules. Optimization of the geometries was performed using the def2-SVP basis set with the  $\omega$ B97X-D functional,<sup>7</sup> then further optimized in the def2-TZVP basis set.<sup>8,9</sup> A frequency calculation was then used to ensure that the structures were fully optimized to a minimum.

## Syntheses

### Synthesis of 1,8-naphthyridine bis(2,6-diisopropylphenyl)amide ( $H_2$ NBDA):

A Fisher-Porter bottle (80 mL volume) was filled with 2,7-dichloro-1,8-naphthyridine (0.40 g, 2.0 mmol) and 2,6-di(isopropyl)aniline (0.83 mL, 4.4 mmol, 2.2 equiv.) and degassed by repeated evacuation and refilling under nitrogen. Under nitrogen flow, a solution of Pd(OAc)<sub>2</sub> and XantPhos in toluene (10 mM, 3.0 mL, 1.5 mol%) previously prepared inside a glovebox was added, followed by addition of triethylamine (0.7 mL, 5 mmol, 2.45 equiv.) and toluene (7 mL). The reactor was then purged with CO gas (5 atm) by repeating a pressurization and depressurization cycle 6 times. After the final purging cycle, the reactor was filled with 5 atm CO gas and heated to 100 °C for 20 h (until the internal pressure stabilized). After cooling, the reactor was depressurized and the reaction solution was diluted with 50 mL of dichloromethane (DCM). The product was transferred to a separatory funnel and washed with 1 M HCl (30 mL), K<sub>2</sub>CO<sub>3</sub> solution (1.0 g, 30 mL) and finally saturated NaCl solution (15 mL). After removal of the solvent, the crude product was purified by column chromatography on silica gel using DCM/MeOH 150:1 as eluent. Finally, the product was recrystallized from hot iPrOH to give a white, crystalline material. Yield: 595 mg, 56%.

<sup>1</sup>H-NMR (400 MHz, CD<sub>2</sub>Cl<sub>2</sub>)  $\delta$  9.67 (s, 2H), 8.64 – 8.54 (m, 4H), 7.38 (dd,  $J$  = 8.4, 7.1 Hz, 2H), 7.27 (d,  $J$  = 7.7 Hz, 4H), 3.20 (h,  $J$  = 6.9 Hz, 4H), 1.22 (d,  $J$  = 6.9 Hz, 24H).

<sup>13</sup>C-NMR (151 MHz, CD<sub>2</sub>Cl<sub>2</sub>)  $\delta$  163.53, 154.18, 153.33, 146.96, 139.74, 131.56, 128.87, 126.28, 124.00, 121.70, 29.40, 23.85.

EA Calc. for C<sub>34</sub>H<sub>40</sub>N<sub>4</sub>O<sub>2</sub>: C, 76.09; H, 7.51; N, 10.44; Found: C, 75.52; H, 7.65; N, 10.30. (corresponds to 0.25 equiv. H<sub>2</sub>O per product)

### Synthesis of [NBu<sub>4</sub>][Cu<sub>2</sub>(NBDA)( $\mu$ -Cl)] (1):

Inside a glovebox, a vial was charged with H<sub>2</sub>NBDA (27.1 mg, 0.051 mmol, 1 equiv.) which was dissolved in THF (0.5 mL). To this, a solution of mesitylcopper(I) (19.4 mg, 0.106 mmol, 2.05 equiv.) in THF (0.5 mL) was added and the solution became dark yellow. This solution was then quickly added to another vial charged with [NBu<sub>4</sub>]Cl (14.1 mg, 0.051 mmol, 1.0 equiv.) and THF (0.8 mL), and a rapid color change to dark brown was observed. The reaction solution was stirred at 22 °C for 20 h, then filtered through celite and the solvent was removed under vacuum. The resulting brown solid was triturated with diethyl ether (5 mL) three times, then dried under vacuum for 4 h. The analytically pure product was obtained as a flaky brown solid. Yield: 41 mg, 86%. Crystals suitable for diffraction were grown by vapor diffusion of diethyl ether into a THF solution of the product. Note: addition of a CuMes solution to a mixture of H<sub>2</sub>NBDA and [NBu<sub>4</sub>]Cl in THF produced the desired product in equal yield and purity as the with the procedure described here.

$^1\text{H-NMR}$  (600 MHz,  $\text{CD}_2\text{Cl}_2$ )  $\delta$  8.62 (d,  $J$  = 8.4, 2.4 Hz, 2H), 8.52 (d,  $J$  = 8.3 Hz, 2H), 7.12 – 7.08 (m, 4H), 7.07 – 7.01 (m, 2H), 3.44 – 3.35 (m, 4H), 3.06 – 2.97 (m, 8H), 1.60 – 1.56 (m, 8H), 1.43 – 1.33 (m, 8H), 1.22 (d,  $J$  = 6.9 Hz, 12H), 1.16 (d,  $J$  = 6.9 Hz, 12H), 1.02 – 0.96 (m, 12H).

$^{13}\text{C-NMR}$  (151 MHz,  $\text{CD}_2\text{Cl}_2$ )  $\delta$  166.07, 159.36, 149.39, 147.52, 142.65, 138.95, 125.32, 123.16, 122.84, 122.28, 59.44, 28.69, 24.25, 24.22, 24.10, 23.76, 20.09, 13.72.

EA: Calc. for  $\text{C}_{50}\text{H}_{74}\text{ClCu}_2\text{N}_5\text{O}_2$ : C, 63.46; H, 7.88; N, 11.84; Found: C, 63.55; H, 7.88; N, 11.92.

#### Synthesis of $[\text{Cu}_2(\text{DPFN})(\mu\text{-}1,1\text{-}\text{N}_3)](\text{NTf}_2)_2$ (**2**):

Inside a glovebox, a vial was charged with  $[\text{Cu}_2(\text{DPFN})(\text{MeCN})](\text{NTf}_2)_2$  (30.0 mg, 0.024 mmol, 1 equiv.) and THF (1 mL). To this, a solution of  $[\text{NBu}_4]\text{N}_3$  (7.4 mg, 0.026 mmol, 1.1 equiv.) in THF (2 mL) was added and the reaction mixture cleared and turned purple. The reaction was stirred for 1 h at 22 °C, then the volatiles were removed under vacuum. The crude product was triturated twice with toluene (10 mL) and twice with diethyl ether (5 mL) to remove  $[\text{NBu}_4]^+$  salts. The product was dried under vacuum and obtained as a purple powder. Yield: 18.2 mg, 81%. Crystals suitable for diffraction were grown by vapor diffusion of diethyl ether into a THF solution of the product.

$^1\text{H-NMR}$  (600 MHz,  $\text{THF-d}_8$ )  $\delta$  9.00 (d,  $J$  = 4.8 Hz, 4H), 8.88 (d,  $J$  = 8.6 Hz, 2H), 8.45 (dd,  $J$  = 8.6, 3.3 Hz, 2H), 8.18 (dd,  $J$  = 8.3, 3.5 Hz, 4H), 8.08 (dd,  $J$  = 7.9, 1.7 Hz, 4H), 7.58 (ddd,  $J$  = 7.6, 5.0, 1.2 Hz, 4H).

$^{13}\text{C-NMR}$  (151 MHz,  $\text{THF-d}_8$ )  $\delta$  160.71, 160.51, 154.51, 154.31, 150.98, 150.96, 142.28, 142.26, 140.24, 140.22, 125.86, 124.44, 121.73, 121.64, 120.81, 120.70.

$^{19}\text{F-NMR}$  (565 MHz,  $\text{THF-d}_8$ )  $\delta$  -80.86, -80.87, -174.03.

EA: Calc for  $\text{C}_{32}\text{H}_{20}\text{Cu}_2\text{F}_8\text{N}_{10}\text{O}_4\text{S}_2$ : C, 40.38; H, 2.12; N, 14.72; Found: C, 40.17; H, 1.90; N, 14.39.

#### Synthesis of $[\text{NBu}_4][\text{Cu}_2(\text{NBDA})(\mu\text{-}1,1\text{-}\text{N}_3)]$ (**3**):

Inside a glovebox, a vial was charged with  $\text{H}_2\text{NBDA}$  (55.0 mg, 0.102 mmol, 1 equiv.) and THF (2 mL). To this, a solution of mesitylcopper(I) (39.0 mg, 0.212 mmol, 2.06 equiv.) in THF (2 mL) was added and the solution became dark yellow. A solution of  $[\text{NBu}_4]\text{N}_3$  (29.1 mg, 0.102 mmol, 1.0 equiv.) in THF (1.5 mL) was added to the reaction mixture, followed by a rapid color change to dark brown. The reaction mixture was stirred for 18 h at 22 °C, then filtered through celite and the volatile materials were then removed under vacuum. The crude product was dissolved in THF (ca 1.5 mL) and then crystallized by vapor diffusion of diethyl ether first at -30 °C (36 h), then at 22 °C (additional 36 h) to give gold-brown crystals. The supernatant was decanted and the product was washed with diethyl ether (3 x 2 mL), and finally dried under vacuum. Yield: 70 mg, 72% (Additional product were isolated from the supernatant, giving an additional 5 mg of product). Crystals suitable for diffraction were grown by vapor diffusion of diethyl ether into a THF solution of the product.

$^1\text{H-NMR}$  (600 MHz,  $\text{CD}_2\text{Cl}_2$ )  $\delta$  8.57 (d,  $J$  = 8.2 Hz, 2H), 8.49 (d,  $J$  = 8.3 Hz, 2H), 7.12 (d,  $J$  = 7.5 Hz, 4H), 7.08 (d,  $J$  = 7.4 Hz, 2H), 3.44 – 3.39 (m, 4H), 3.06 – 3.00 (m, 8H), 1.61 – 1.53 (m, 8H), 1.39 (q,  $J$  = 7.4 Hz, 8H), 1.26 (d,  $J$  = 6.9 Hz, 12H), 1.17 (d,  $J$  = 6.9 Hz, 12H), 1.00 (t,  $J$  = 7.3 Hz, 12H).

$^{13}\text{C-NMR}$  (151 MHz,  $\text{CD}_2\text{Cl}_2$ )  $\delta$  166.63, 158.91, 149.65, 147.32, 142.84, 138.75, 125.00, 123.37, 122.93, 122.18, 59.46, 59.44, 59.42, 28.76, 24.24, 24.01, 23.71, 20.10, 13.71.

EA: Calc. for  $\text{C}_{50}\text{H}_{74}\text{Cu}_2\text{N}_8\text{O}_2$ : C, 63.46; H, 7.88; N, 11.84; Found: C, 63.55; H, 7.88; N, 11.92.

#### Synthesis of [Cu<sub>2</sub>(NBDA)(CNXyl)<sub>2</sub>] (**4**)

Inside a glovebox, a vial was charged with H<sub>2</sub>NBDA (45.0 mg, 0.084 mmol, 1 equiv.) and THF (1.5 ml). To this, a solution of mesitylcopper(I) (31.2 mg, 0.171 mmol, 2.05 equiv.) in THF (1 mL) was added and the solution became dark yellow. A solution of xylyl isocyanide (21.8 mg, 0.166 mmol, 2.0 equiv.) in THF (0.5 mL) was added to the reaction mixture leading to an immediate color change to dark red. The solution was stirred for 44 h at 22 °C, with a pale reddish precipitate forming. The solvent was subsequently removed under vacuum and the resulting solid was triturated with diethyl ether (10 ml) and then pentane (2 x 10 mL). After removal of volatiles under vacuum, the product was obtained as a dark orange powder. Further purification was achieved by layering a concentrated THF solution of the product (ca. 5 mL) with pentane (15 mL) at 22 °C to give orange-red crystals. Yield: 71 mg, 92%.

<sup>1</sup>H-NMR (600 MHz, CD<sub>2</sub>Cl<sub>2</sub>) δ 8.75 – 8.67 (m, 4H), 7.24 – 7.10 (m, 4H), 7.06 – 6.99 (m, 8H), 3.28 (dt, J = 6.7 Hz, 4H), 2.09 (s, 12H), 1.07 (d, J = 6.9, 1.6 Hz, 12H), 0.87 (d, J = 6.9 Hz, 12H).

<sup>13</sup>C-NMR (151 MHz, CD<sub>2</sub>Cl<sub>2</sub>) δ 165.82, 160.62, 149.09, 146.05, 142.73, 141.12, 135.70, 130.13, 128.51, 126.42, 125.91, 125.13, 123.88, 123.08, 122.97, 117.77, 117.65, 28.83, 24.07, 23.51, 18.90.

EA: Calc. for C<sub>52</sub>H<sub>56</sub>Cu<sub>2</sub>N<sub>6</sub>O<sub>2</sub>: C, 67.58; H, 6.11; N, 9.09; Found: C, 67.34; H, 6.02; N, 8.99.

#### Reduction of **1** with KC<sub>8</sub>

Inside a glovebox, a solution of **1** (4.2 mg, 4 μmol, 1 equiv.) in THF (0.3 mL) was added to a stirring suspension of KC<sub>8</sub> (0.6 mg, 4 μmol, 1 equiv.) in THF (0.3 mL). An immediate appearance of a dark green color was observed. The solution was filtered through glass wool and the solvent then removed under vacuum. The product was then triturated with diethyl ether (1 ml) and dried under vacuum to give a dark green solid. An NMR spectrum in proteo-THF showed no signals other than solvent.

## Supplementary Figures and Tables

Figure S1: IR spectrum of ligand H<sub>2</sub>NBDA.

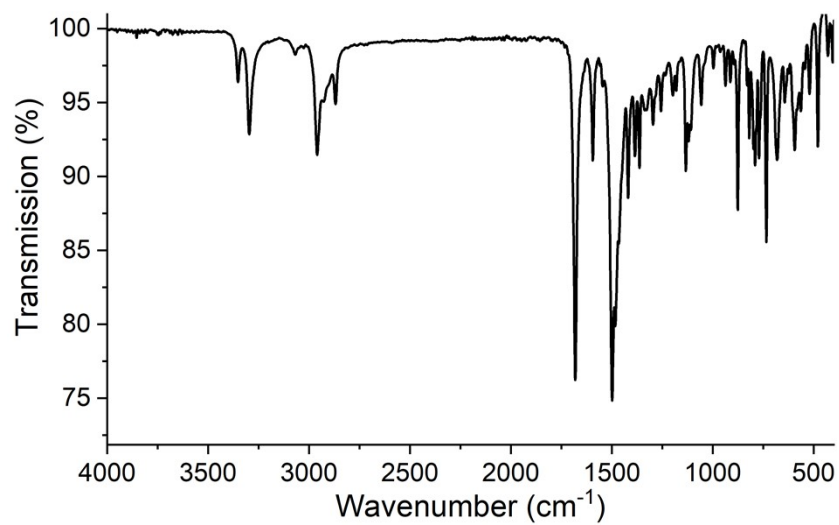

Figure S2: IR spectrum of complex 1.

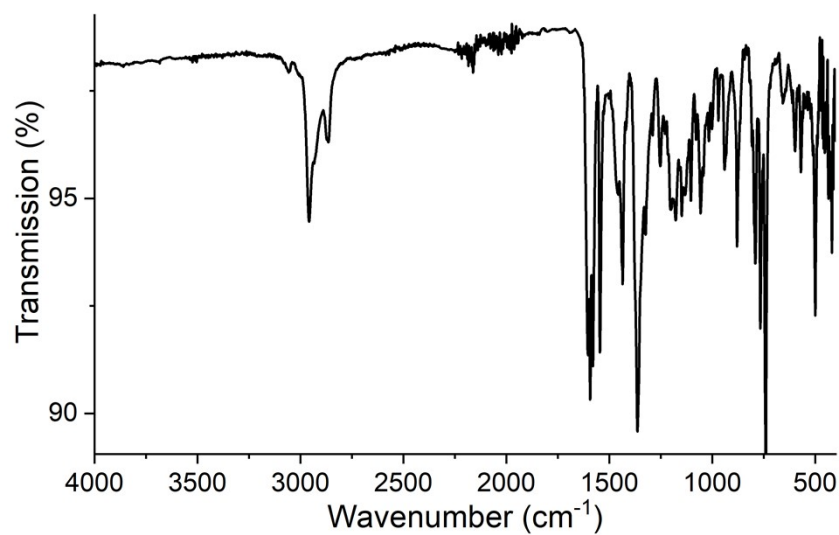

Figure S3: IR spectrum of complex **2**.

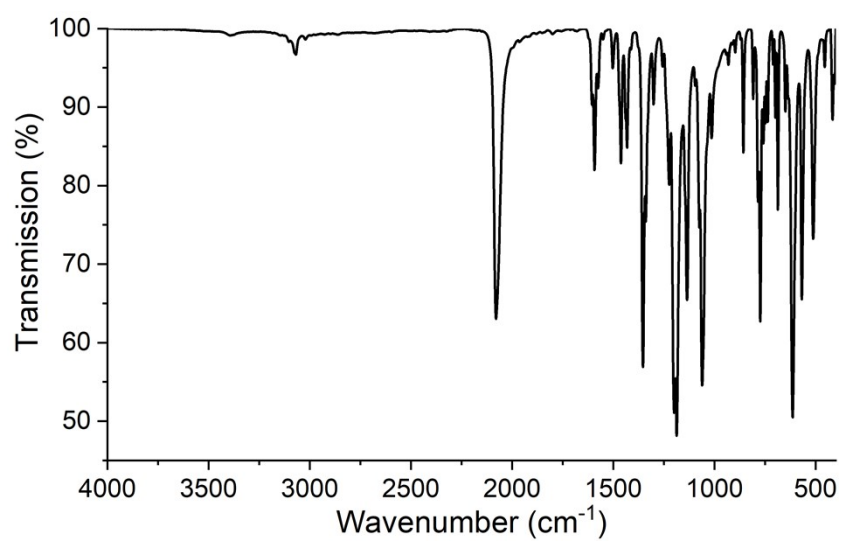

Figure S4: IR spectrum of complex **3**.

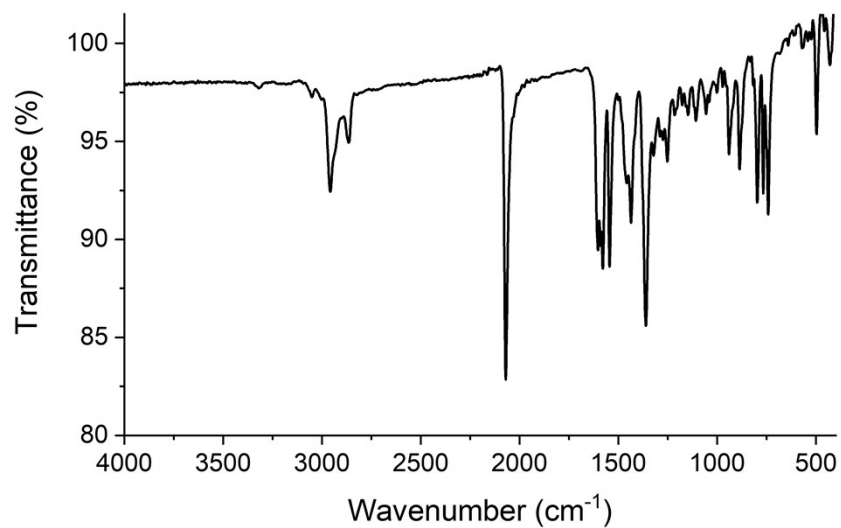

Figure S5: IR spectrum of complex **4**.

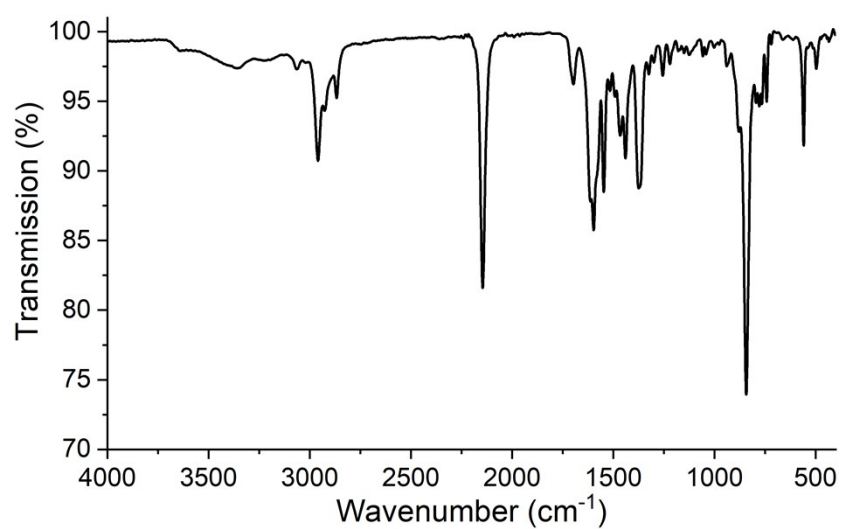

Table S1. Natural charges for copper atoms and ligands in the selected complexes. Charges are per atom (for copper) or per ligand (for bridging ligands).

| Complex                                                               | Calculated natural charge |                      |                 |
|-----------------------------------------------------------------------|---------------------------|----------------------|-----------------|
|                                                                       | Cu                        | Naphthyridine ligand | Bridging ligand |
| [Cu <sub>2</sub> (NBDA)(μ-Cl)] <sup>-</sup> ( <b>1</b> )              | 0.52                      | -1.53                | -0.51           |
| [Cu <sub>2</sub> (DPFN)(μ-N <sub>3</sub> )] <sup>+</sup> ( <b>2</b> ) | 0.53                      | 0.58                 | -0.63           |
| [Cu <sub>2</sub> (NBDA)(μ-N <sub>3</sub> )] <sup>-</sup> ( <b>3</b> ) | 0.60                      | -1.54                | -0.65           |
| [Cu <sub>2</sub> (NBDA)(XylNC) <sub>2</sub> ] ( <b>4</b> )            | 0.49                      | -1.32                | 0.17            |
| [Cu <sub>2</sub> (DPFN)(μ-Cl)] <sup>+</sup>                           | 0.45                      | 0.58                 | -0.49           |
| [Cu <sub>2</sub> (py-np)(μ-Cl) <sub>2</sub> ]                         | 0.47                      | 0.22                 | -0.58           |

Figure S6: highest occupied and unoccupied MOs of complex **1** from DFT calculation.

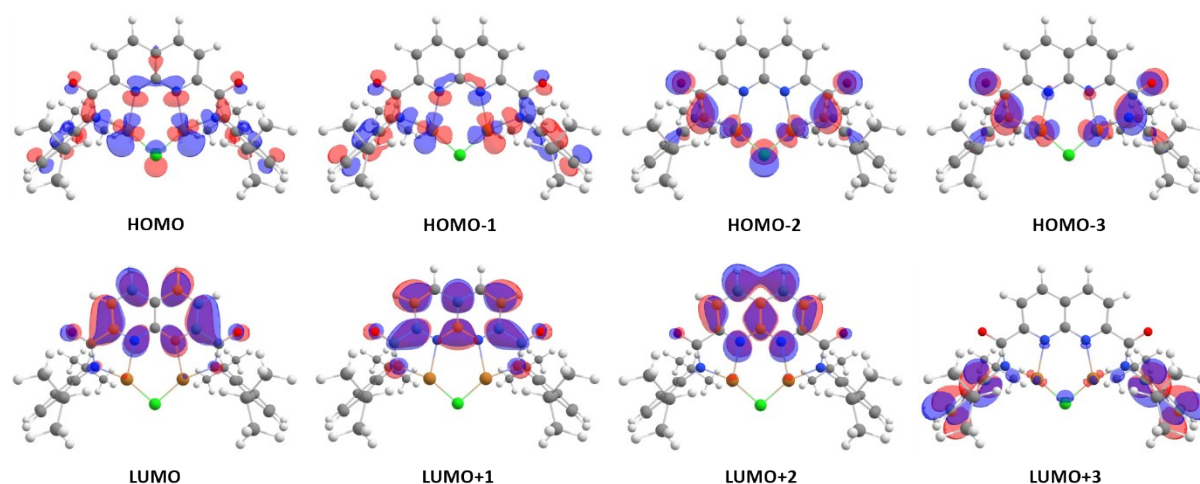

Figure S7: highest occupied and unoccupied MOs of complex **2** from DFT calculation.

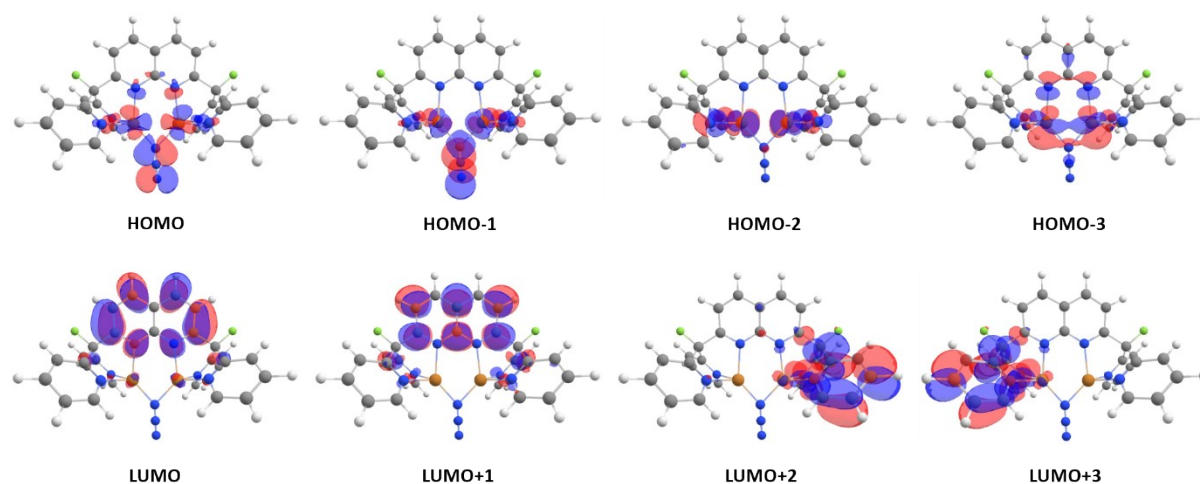

Figure S8: highest occupied and unoccupied MOs of complex **3** from DFT calculation.

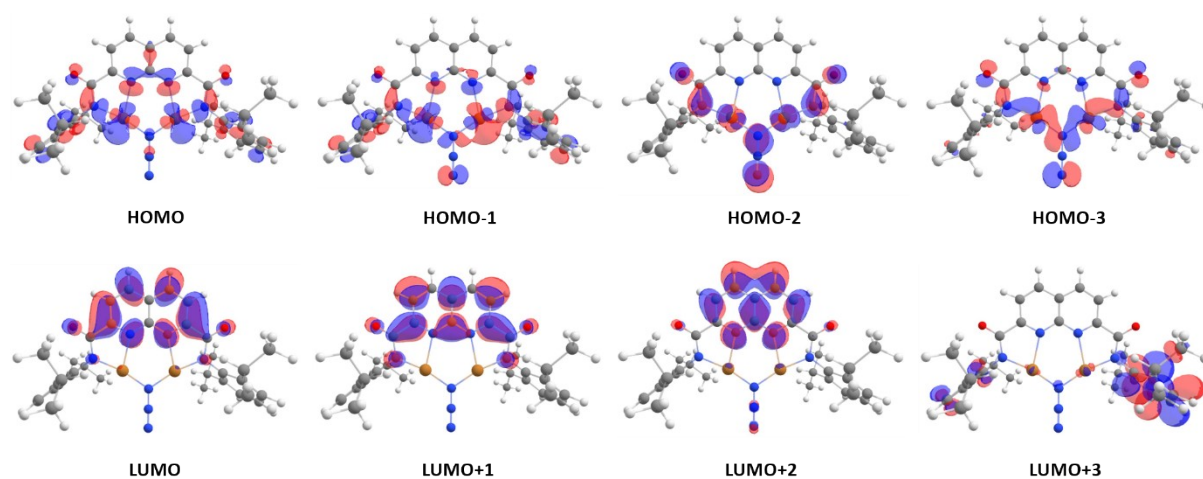

Figure S9: highest occupied and unoccupied MOs of complex **4** from DFT calculation.

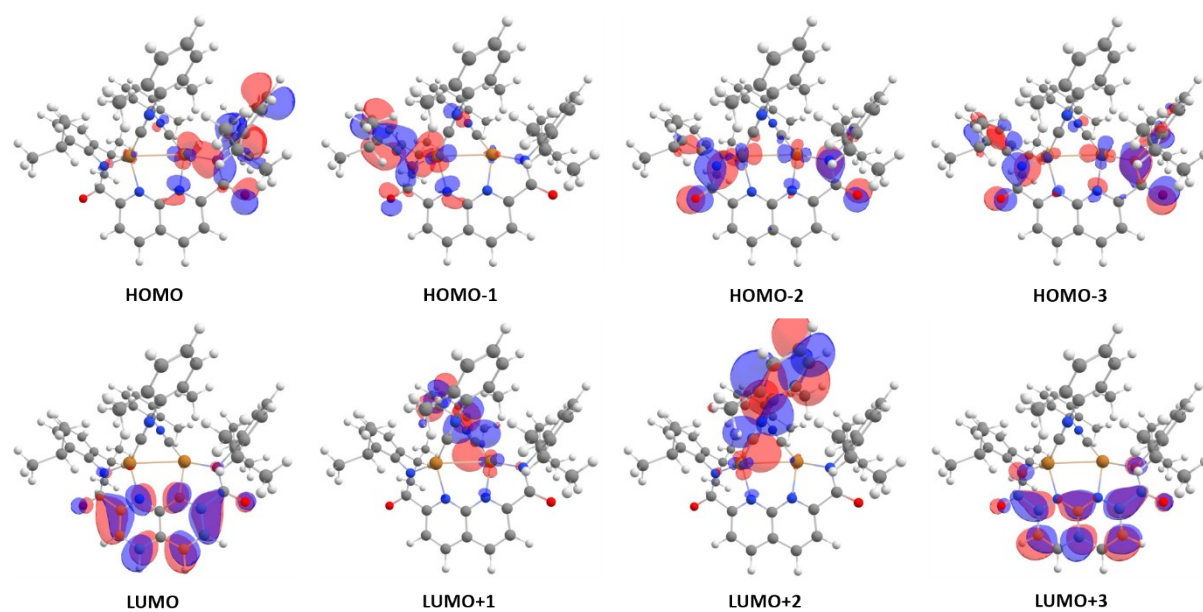

Figure S10: highest occupied and unoccupied MOs of  $[\text{Cu}_2(\text{DPFN})(\text{Cl})]^+$  from DFT calculation.

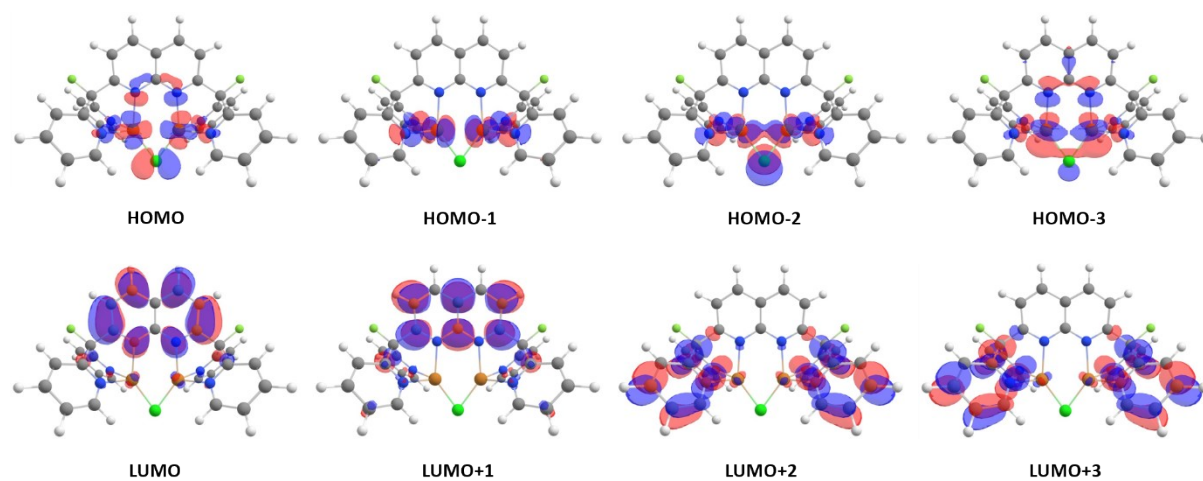

Figure S11: highest occupied and unoccupied MOs of  $[\text{Cu}_2(\text{bp-np})(\text{Cl})_2]$  from DFT calculation.

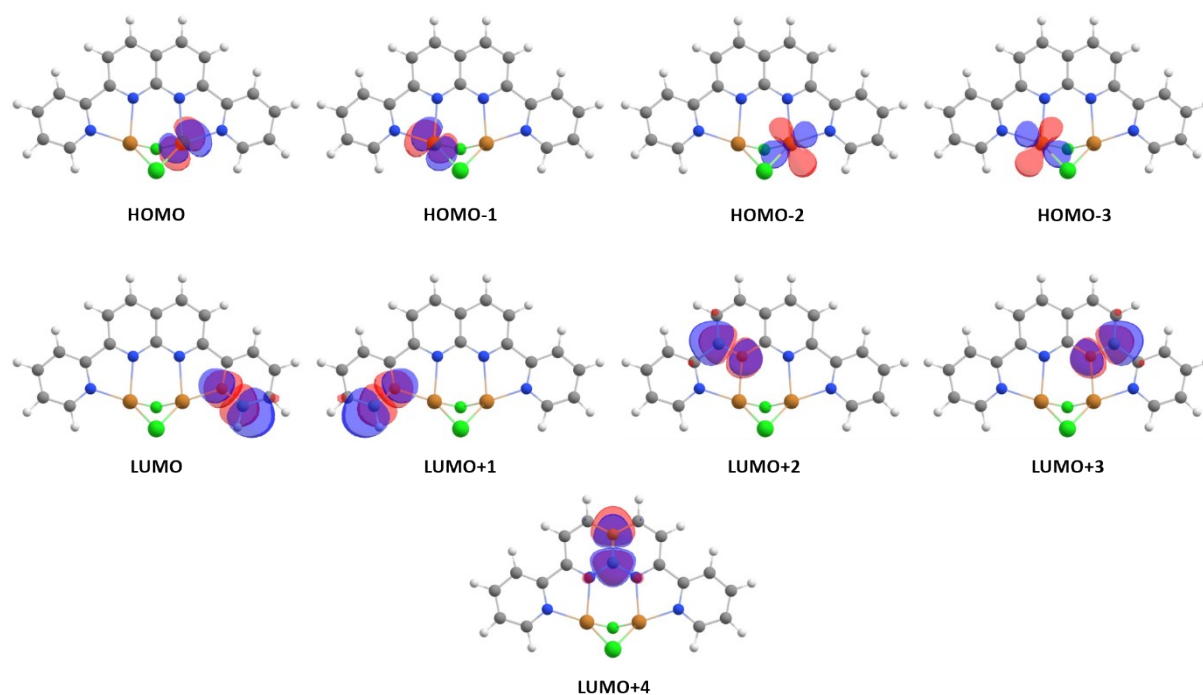

Figure S12: CV of complex **2** with different scan ranges:  $-1.2$  V to  $0.7$  V vs ferrocene (blue);  $-2.2$  V to  $0.05$  V vs ferrocene (green);  $-3.0$  V to  $1.15$  V vs ferrocene (orange).

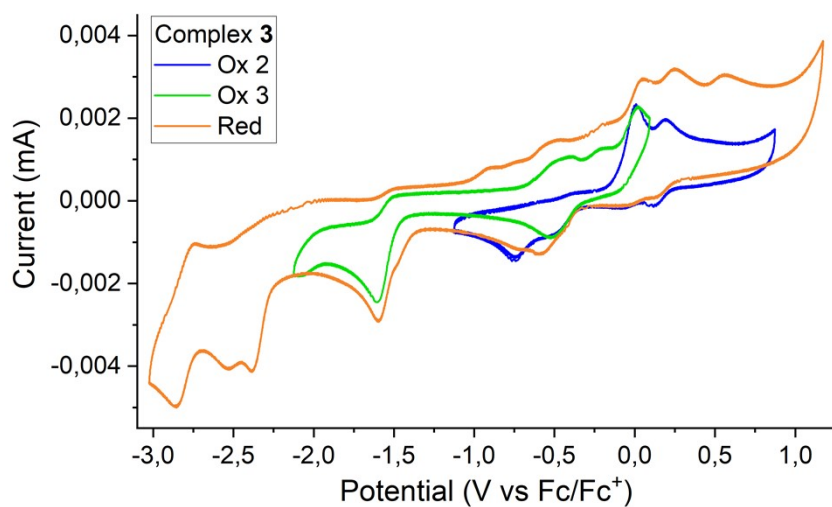

## NMR spectra

Figure S13:  $^1\text{H}$ -NMR spectrum of  $\text{H}_2\text{NBDA}$  (in dichloromethane- $d_2$ )

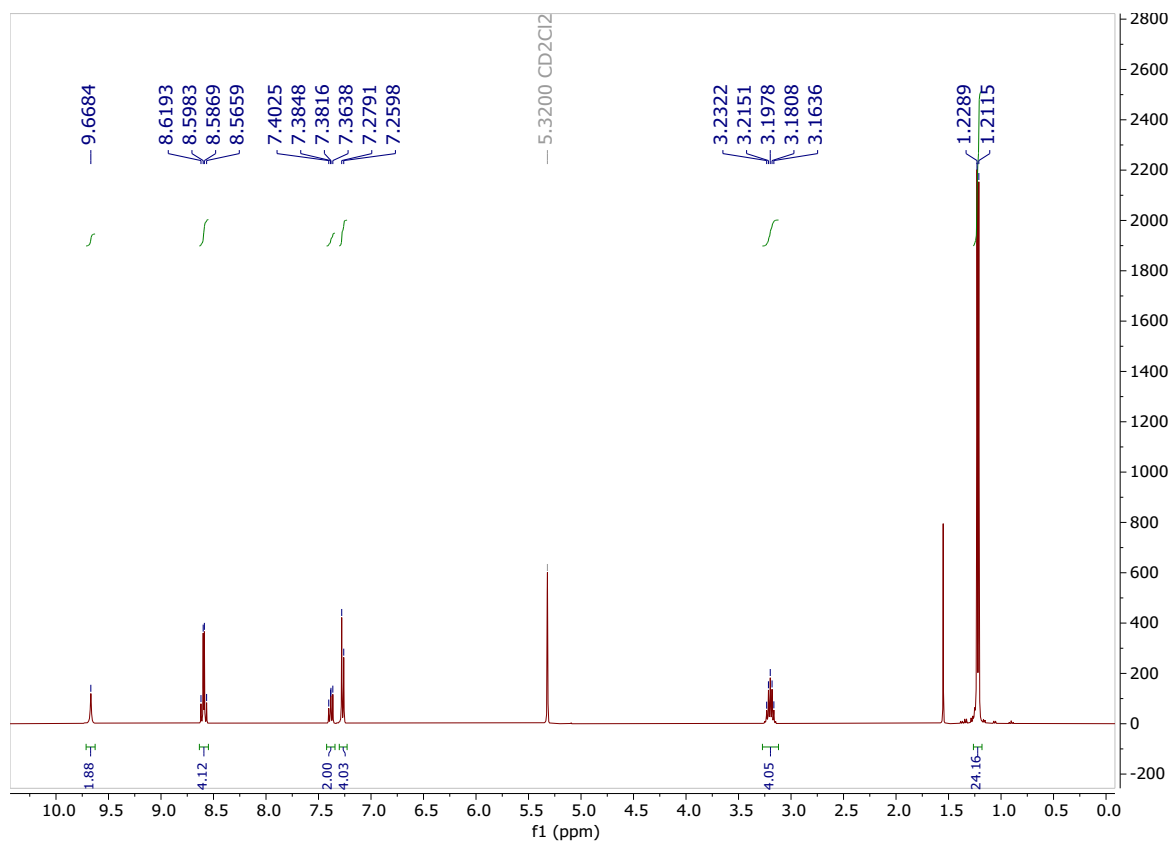

Figure S14:  $^{13}\text{C}$ -NMR spectrum of  $\text{H}_2\text{NBDA}$  (in dichloromethane- $d_2$ )

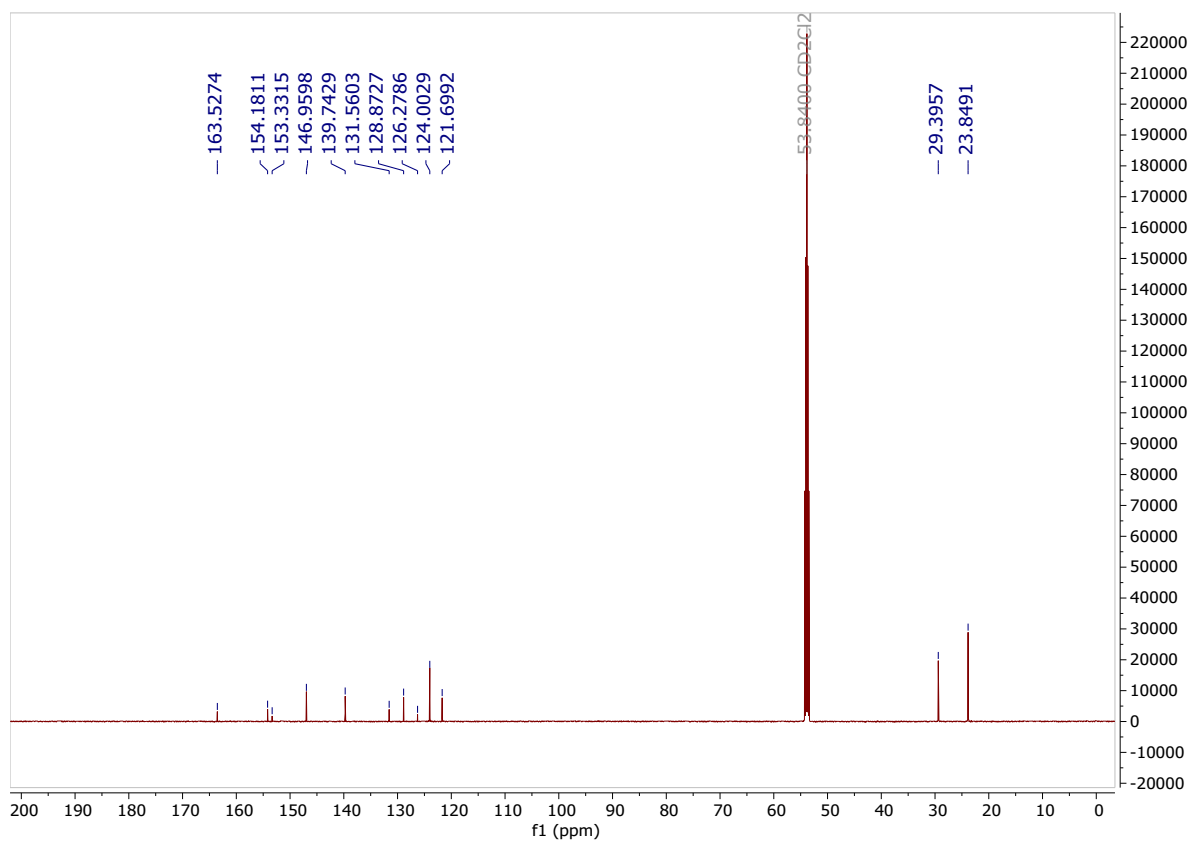

Figure S15: COSY spectrum of H<sub>2</sub>NBDA (dichloromethane-*d*<sub>2</sub>)

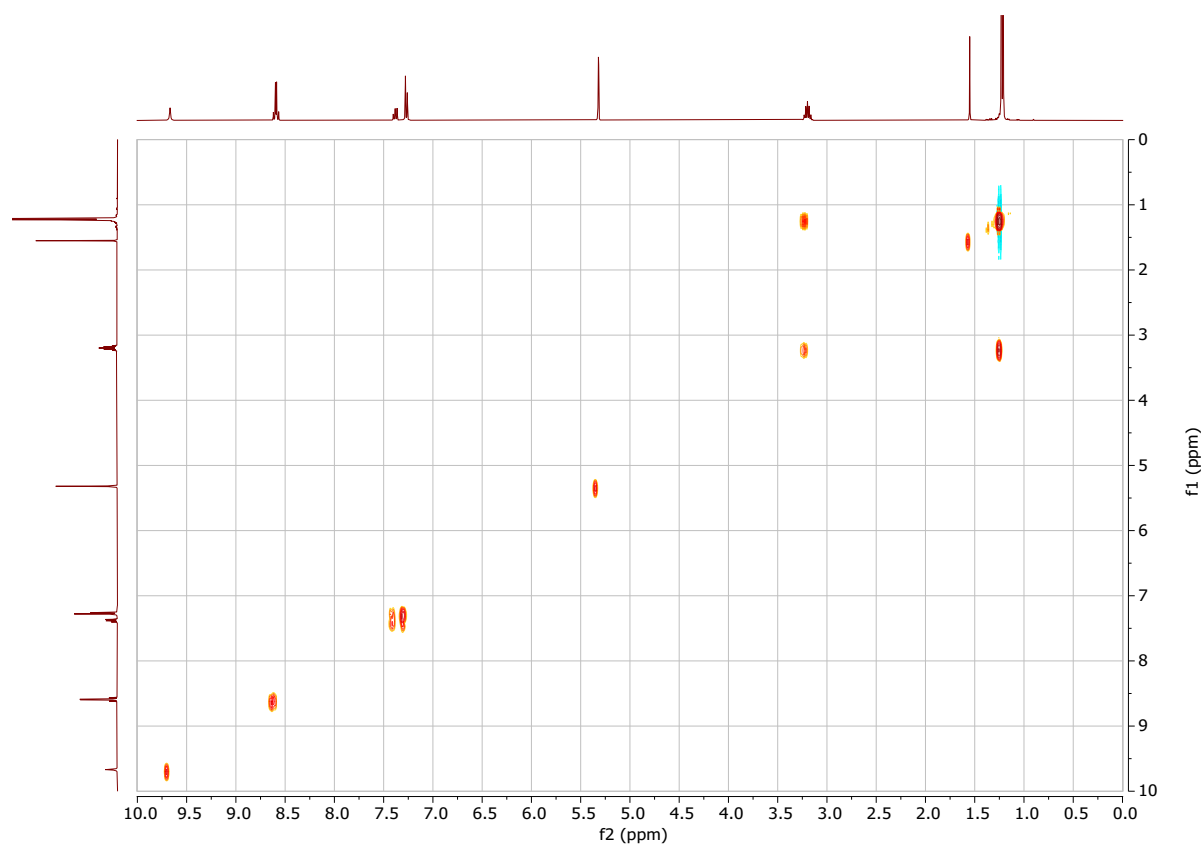

Figure S16: <sup>1</sup>H-NMR spectrum of **1** (dichloromethane-*d*<sub>2</sub>)

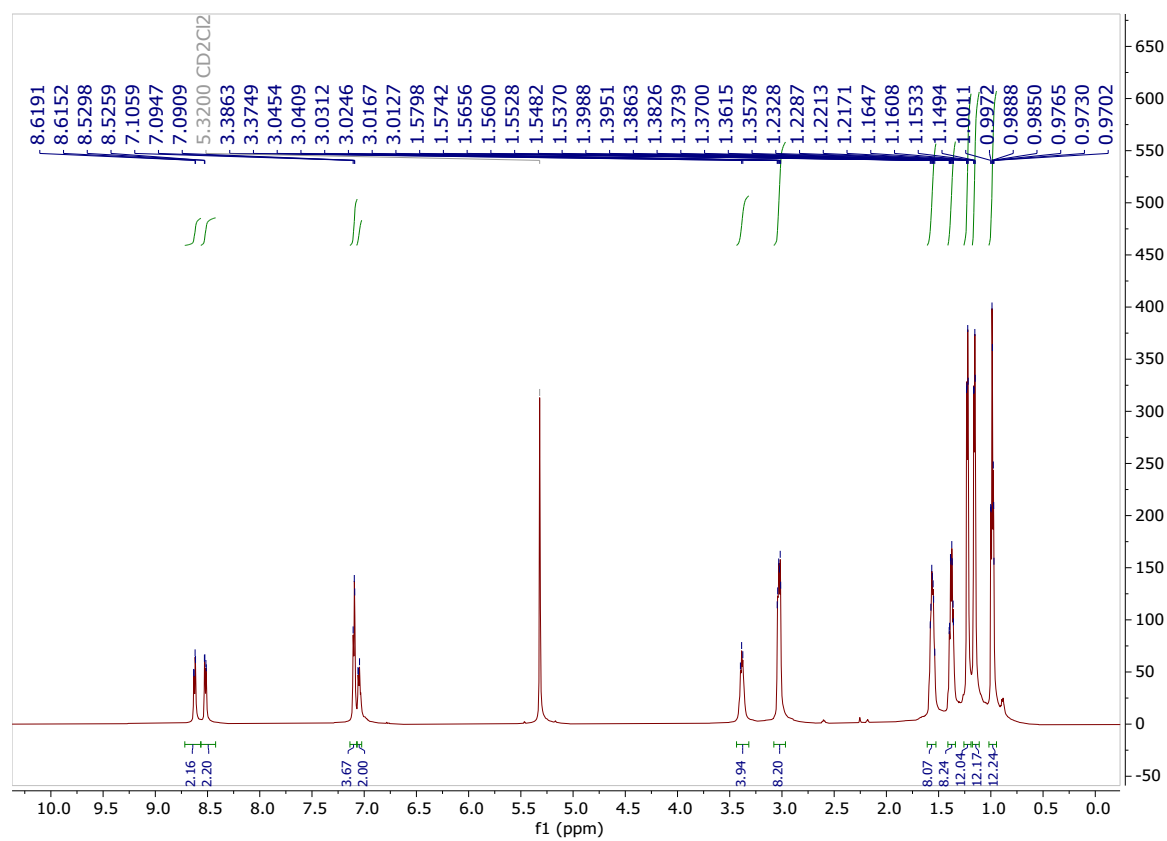

Figure S17:  $^{13}\text{C}$ -NMR spectrum of **1** (dichloromethane- $d_2$ )

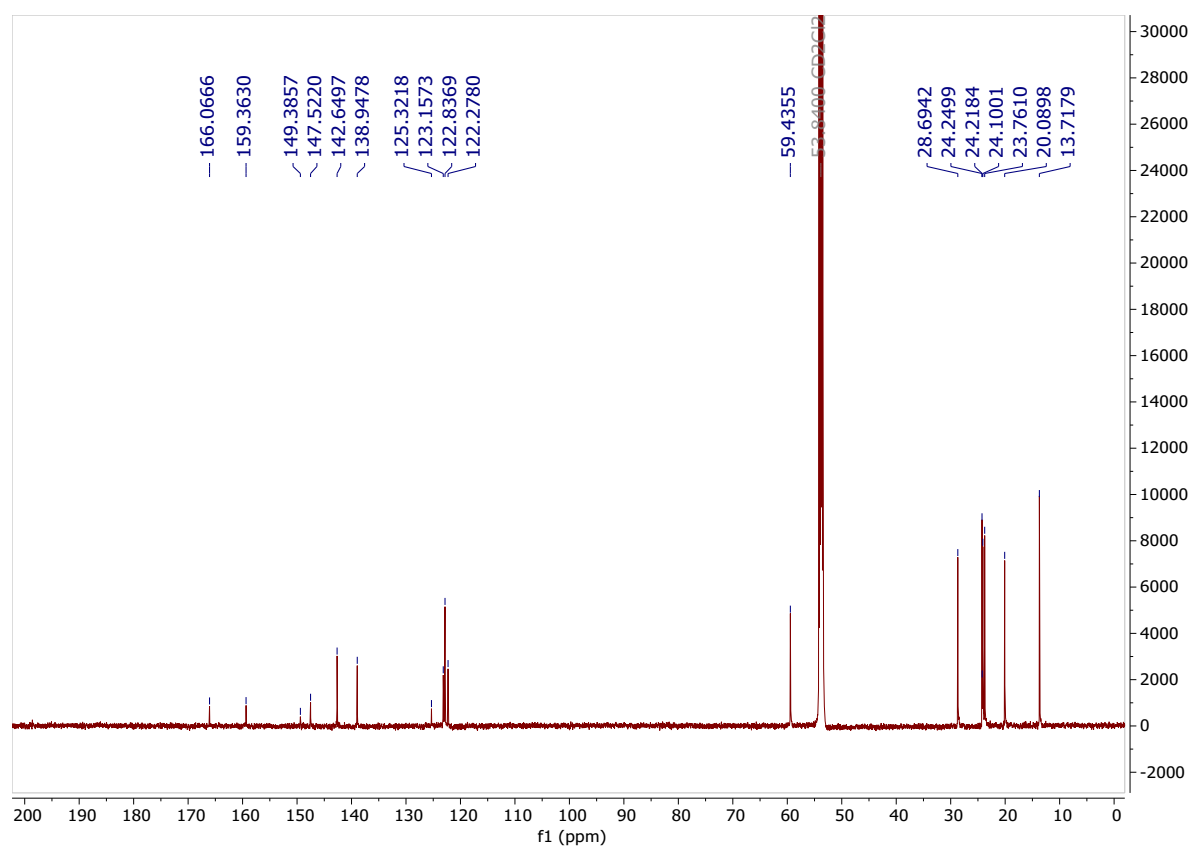

Figure S18: COSY spectrum of **1** (dichloromethane- $d_2$ )

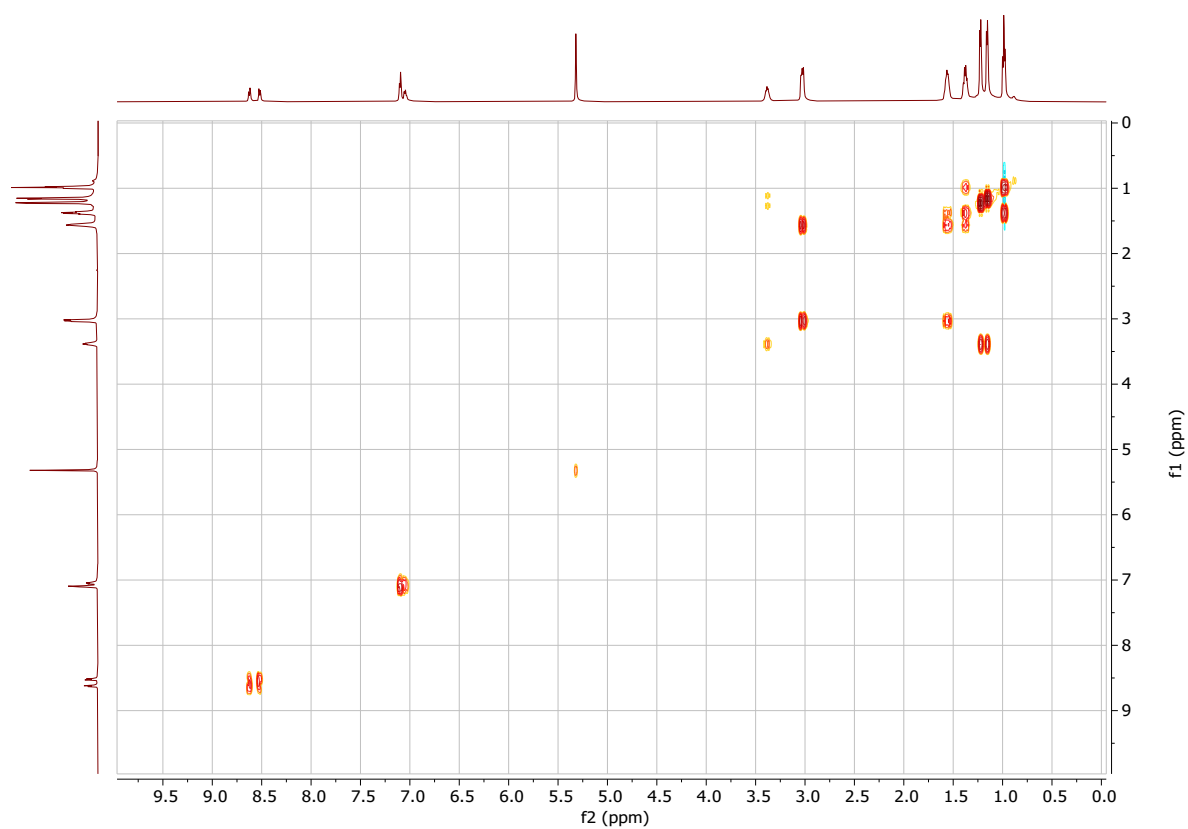

Figure S19:  $^1\text{H}$ -NMR spectrum of **2** ( $\text{THF-}d_8$ )

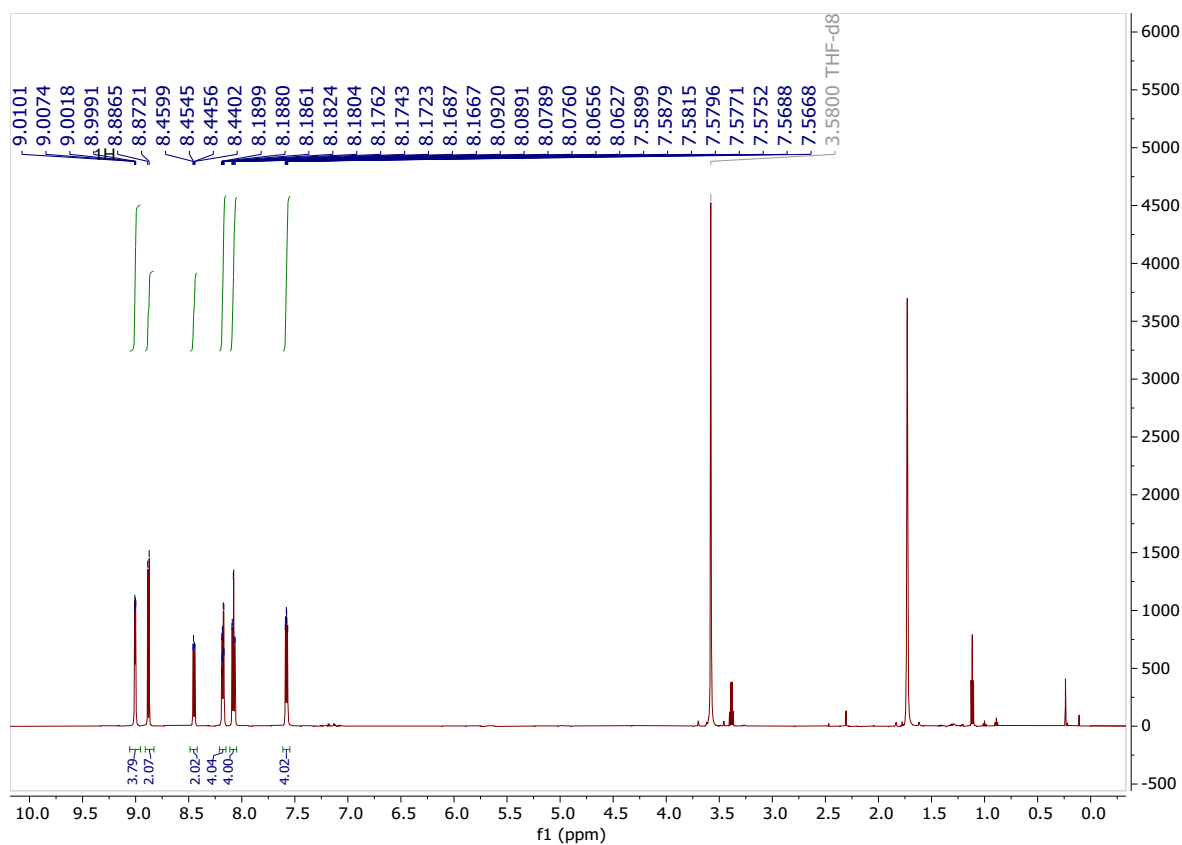

Figure S20:  $^{13}\text{C}$ -NMR spectrum of **2** ( $\text{THF-}d_8$ )

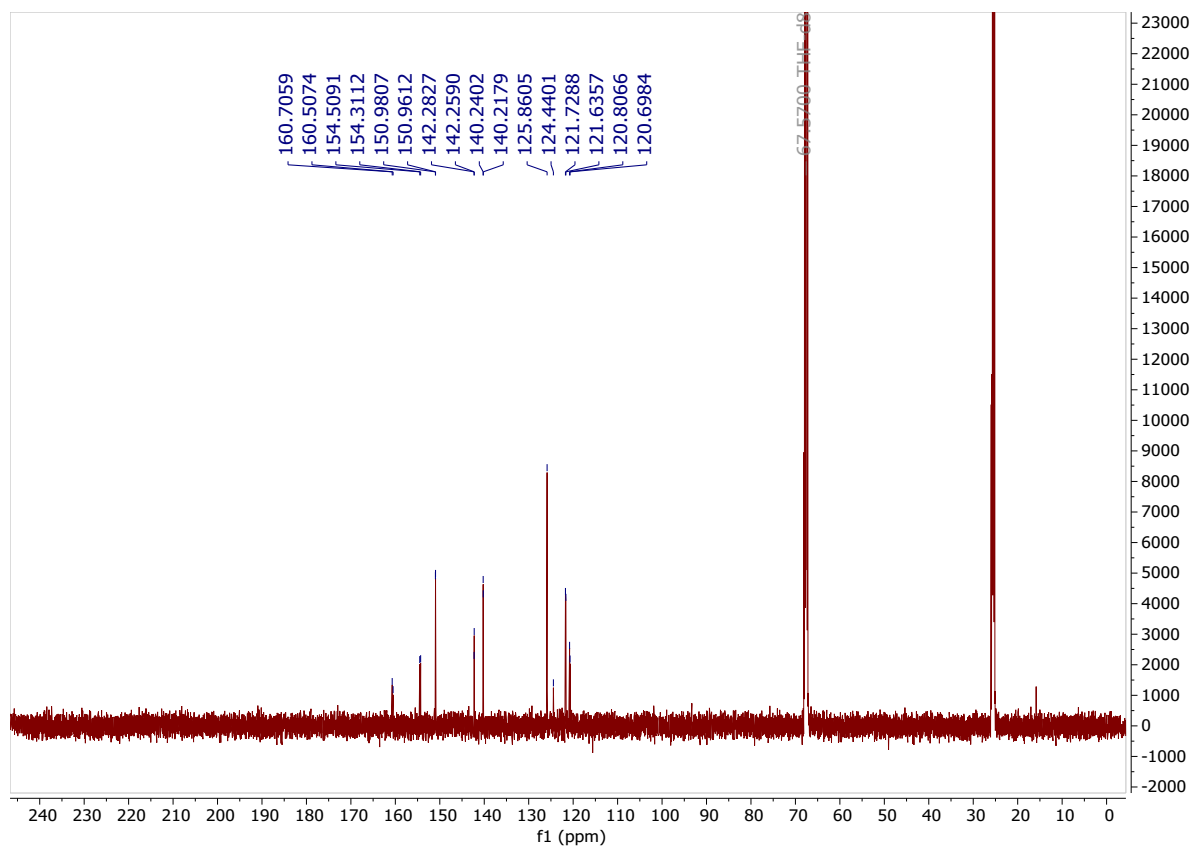

Figure S21:  $^{19}\text{F}$ -NMR spectrum of **2** ( $\text{THF-}d_8$ )

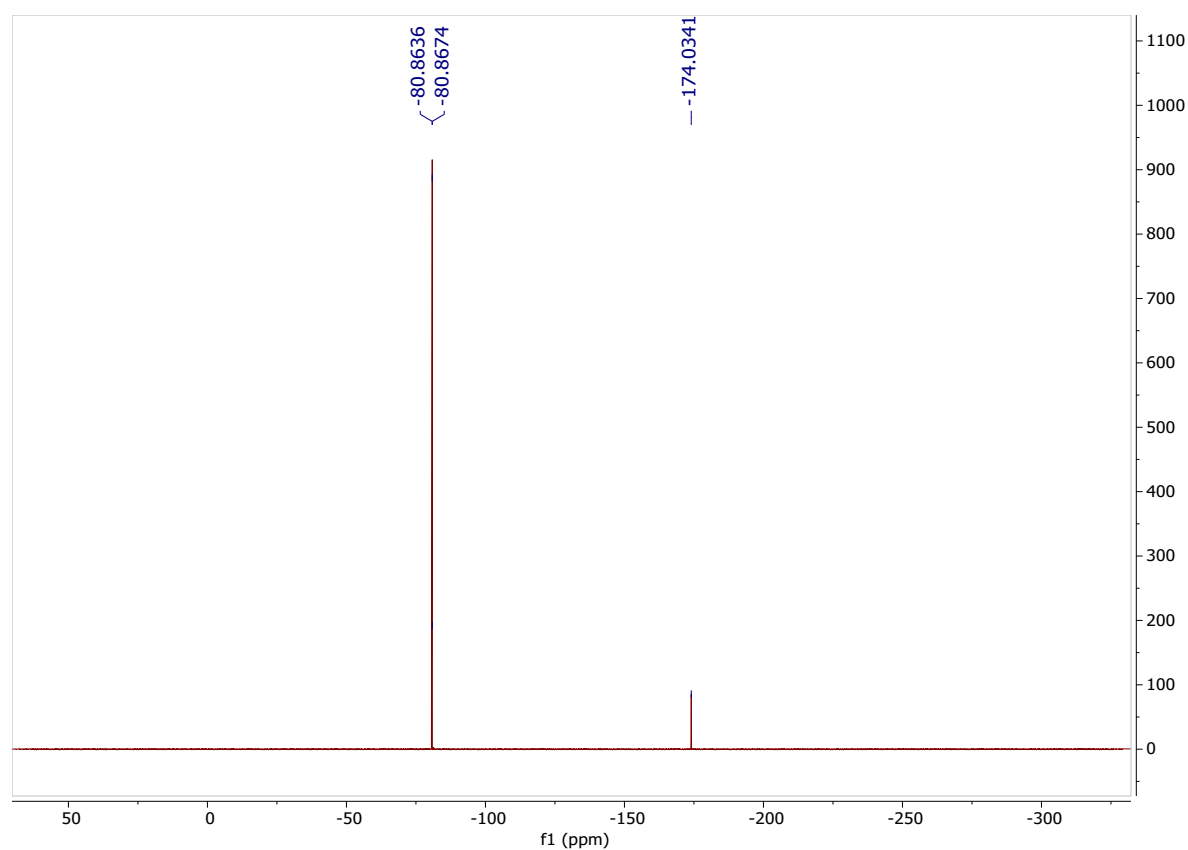

Figure S22:  $^1\text{H}$ -NMR spectrum of **3** (dichloromethane- $d_2$ )

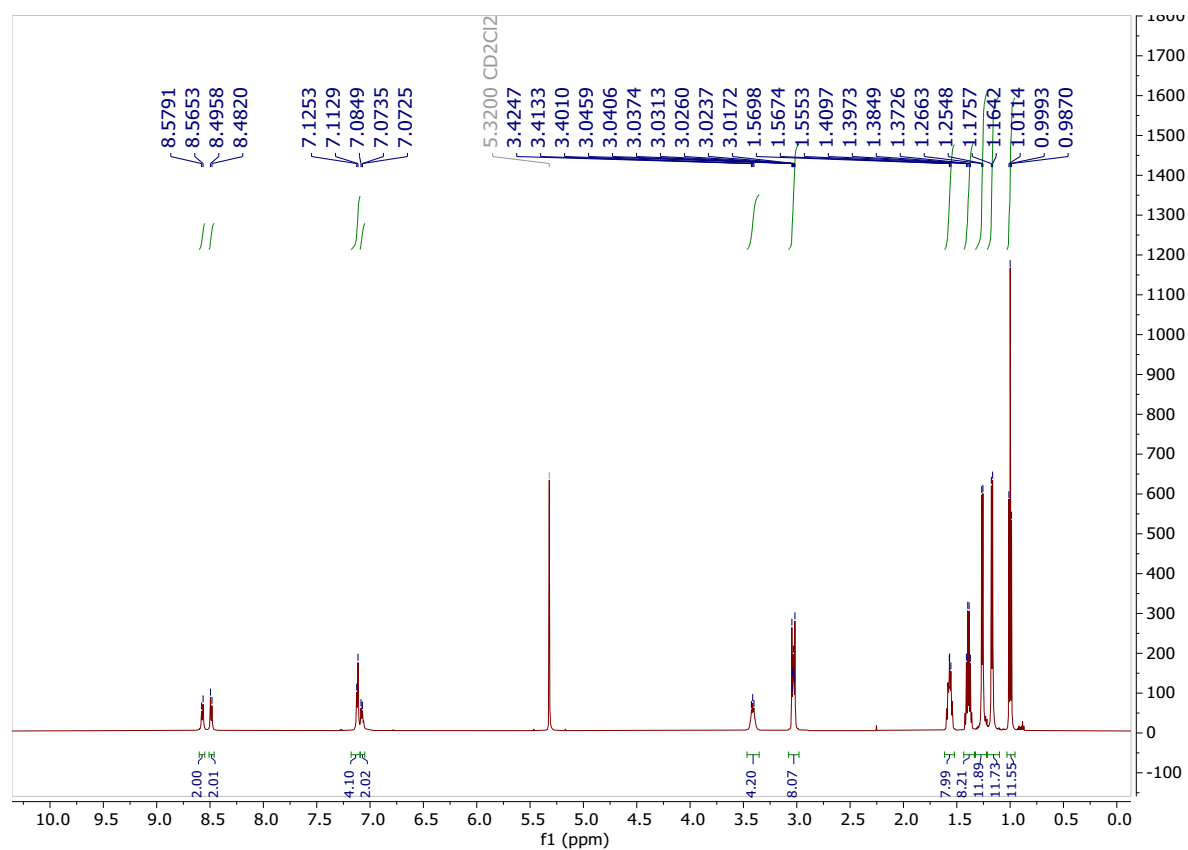

Figure S23:  $^{13}\text{C}$ -NMR spectrum of **3** (dichloromethane- $d_2$ )

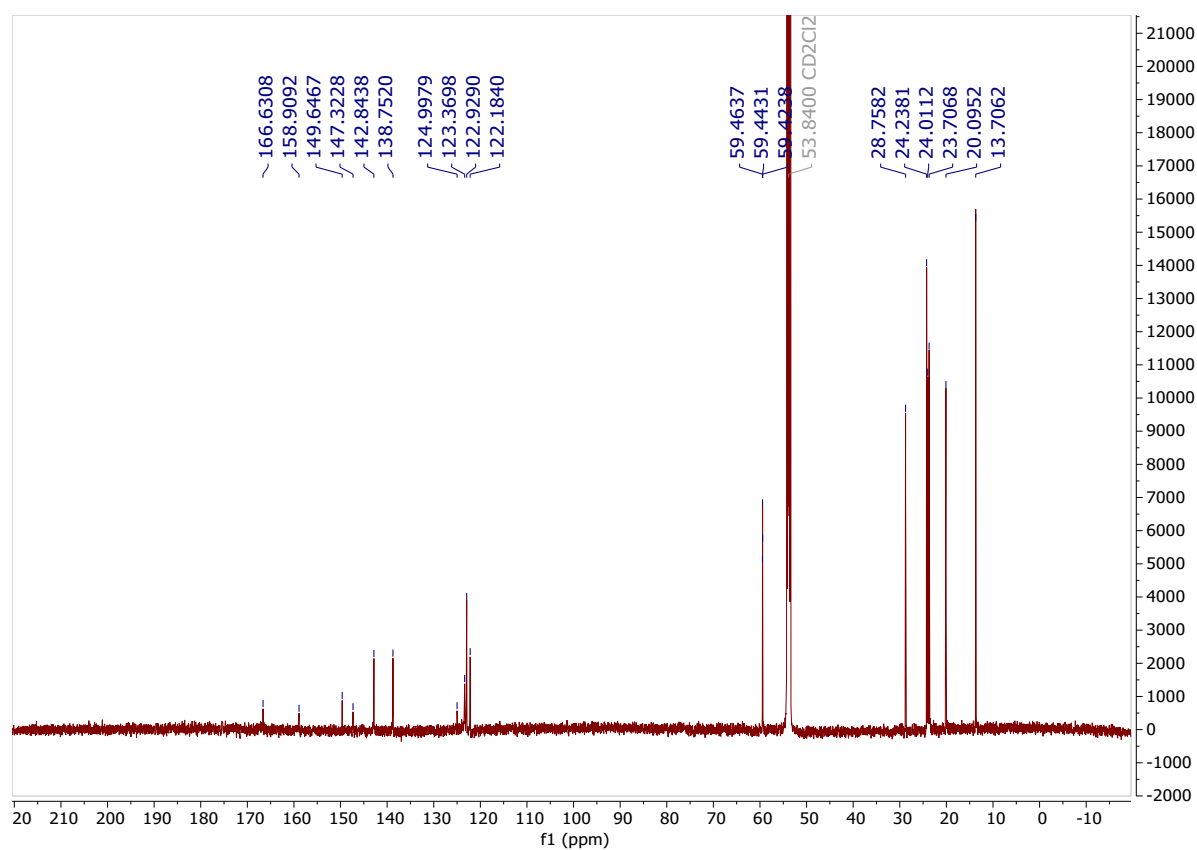

Figure S24: COSY spectrum of **3** (dichloromethane- $d_2$ )

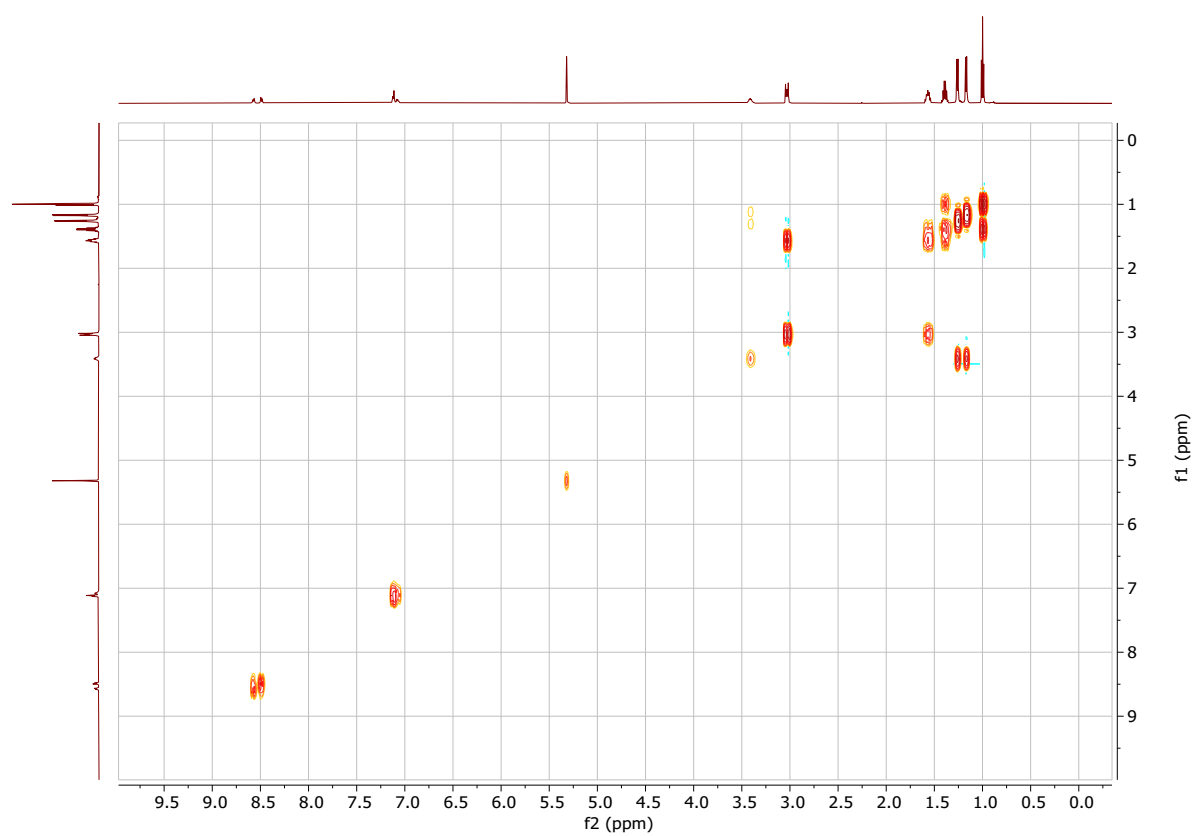

Figure S25:  $^1\text{H}$ -NMR spectrum of **4** (dichloromethane- $d_2$ )

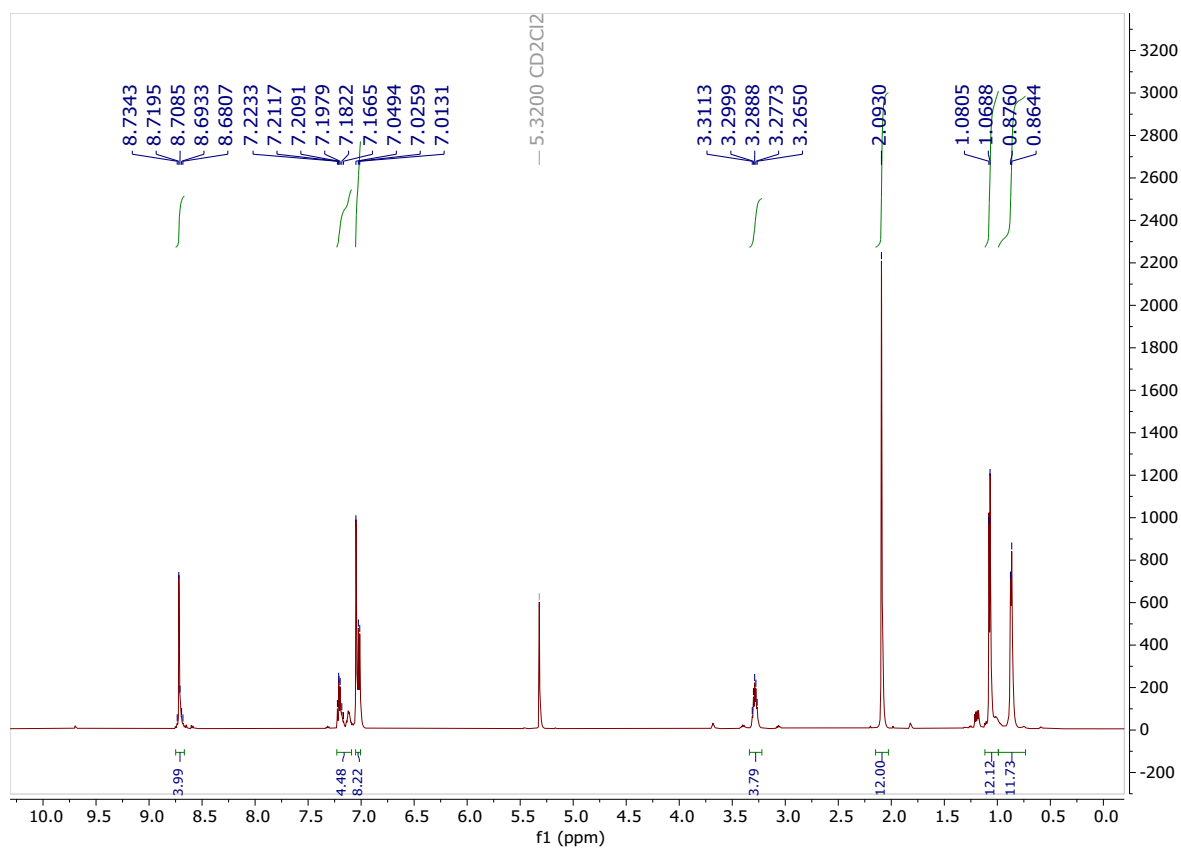

Figure S26:  $^{13}\text{C}$ -NMR spectrum of **4** (dichloromethane- $d_2$ )

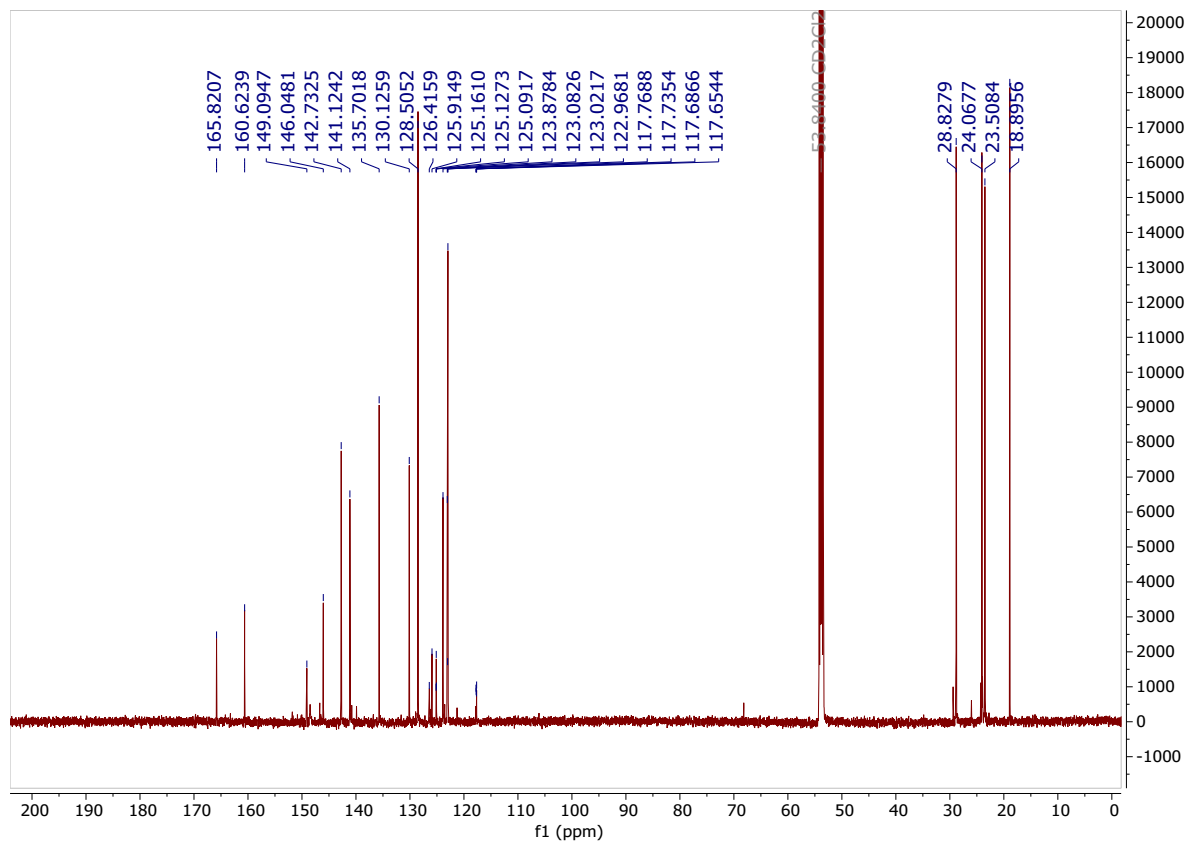

Figure S27: COSY spectrum of **4** (dichloromethane- $d_2$ )

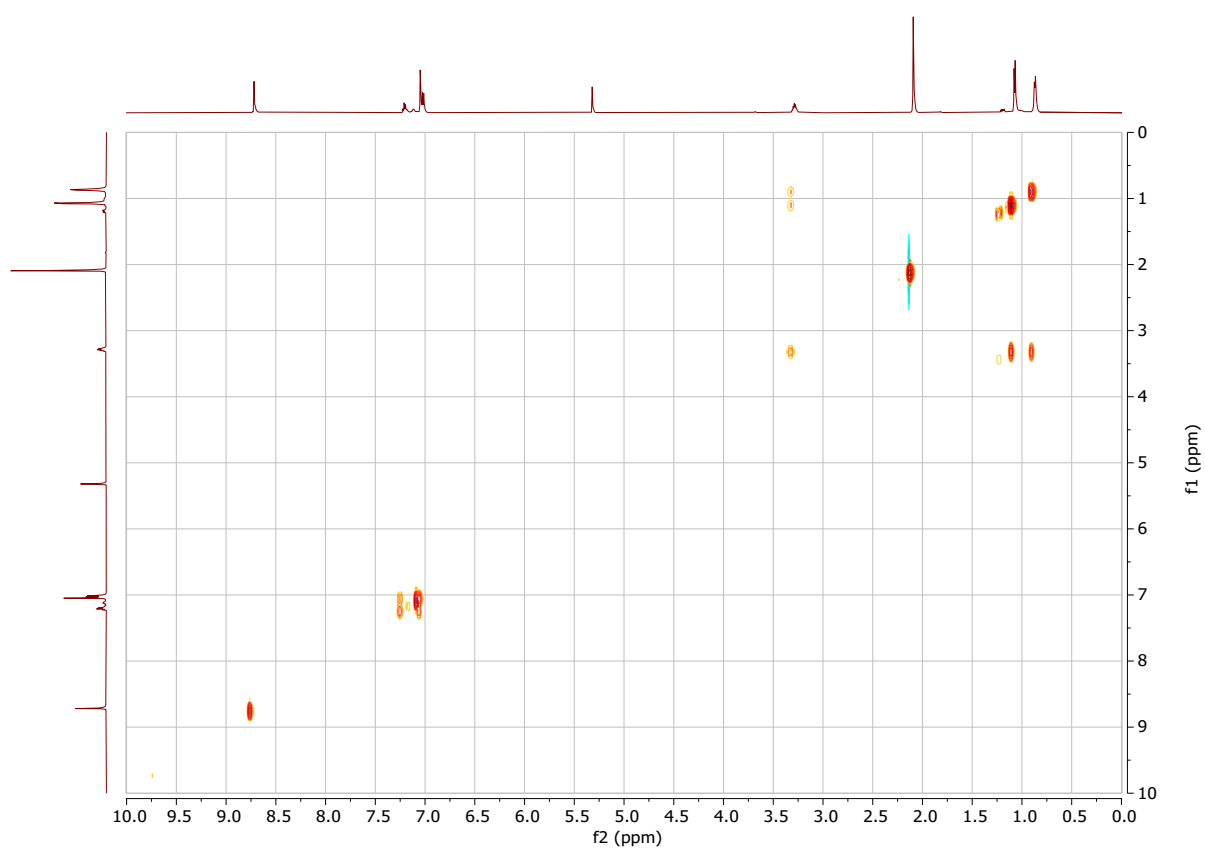

## Solid-state molecular structures

### Complex 1

|                                   |                                                                                  |                 |
|-----------------------------------|----------------------------------------------------------------------------------|-----------------|
| Identification code               | (NBu <sub>4</sub> )[Cu <sub>2</sub> (NBDA)(Cl)]                                  | LS260b_a        |
| Empirical formula                 | C <sub>50</sub> H <sub>74</sub> Cl Cu <sub>2</sub> N <sub>5</sub> O <sub>2</sub> |                 |
| Formula weight                    | 939.67                                                                           |                 |
| Temperature                       | 100(2) K                                                                         |                 |
| Wavelength                        | 0.7288 Å                                                                         |                 |
| Crystal system                    | Monoclinic                                                                       |                 |
| Space group                       | P2 <sub>1</sub> /c                                                               |                 |
| Unit cell dimensions              | a = 16.8395(12) Å                                                                | α = 90°.        |
|                                   | b = 28.680(2) Å                                                                  | β = 90.644(3)°. |
|                                   | c = 20.3614(14) Å                                                                | γ = 90°.        |
| Volume                            | 9833.2(12) Å <sup>3</sup>                                                        |                 |
| Z                                 | 8                                                                                |                 |
| Density (calculated)              | 1.269 Mg/m <sup>3</sup>                                                          |                 |
| Absorption coefficient            | 1.028 mm <sup>-1</sup>                                                           |                 |
| F(000)                            | 4000                                                                             |                 |
| Crystal size                      | 0.080 x 0.065 x 0.060 mm <sup>3</sup>                                            |                 |
| Theta range for data collection   | 1.913 to 26.184°.                                                                |                 |
| Index ranges                      | -20 ≤ h ≤ 20, -34 ≤ k ≤ 34, -24 ≤ l ≤ 24                                         |                 |
| Reflections collected             | 130939                                                                           |                 |
| Independent reflections           | 18228 [R(int) = 0.0647]                                                          |                 |
| Completeness to theta = 25.930°   | 99.9 %                                                                           |                 |
| Absorption correction             | Semi-empirical from equivalents                                                  |                 |
| Max. and min. transmission        | 0.941 and 0.810                                                                  |                 |
| Refinement method                 | Full-matrix least-squares on F <sup>2</sup>                                      |                 |
| Data / restraints / parameters    | 18228 / 52 / 1100                                                                |                 |
| Goodness-of-fit on F <sup>2</sup> | 1.087                                                                            |                 |
| Final R indices [I > 2σ(I)]       | R1 = 0.0642, wR2 = 0.1706                                                        |                 |
| R indices (all data)              | R1 = 0.0856, wR2 = 0.1901                                                        |                 |
| Extinction coefficient            | n/a                                                                              |                 |
| Largest diff. peak and hole       | 1.400 and -1.531 e.Å <sup>-3</sup>                                               |                 |

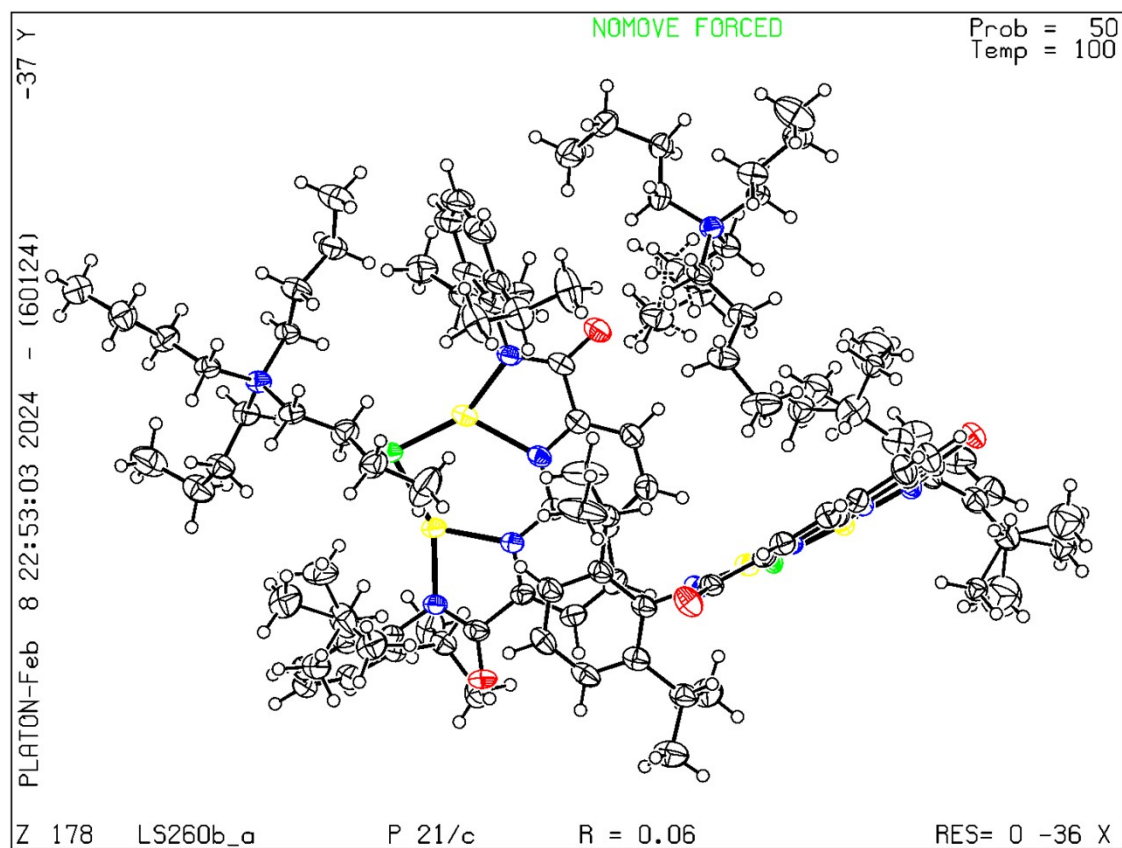

**Complex 2**

|                                   |                                                              |                    |
|-----------------------------------|--------------------------------------------------------------|--------------------|
| Identification code               | [Cu <sub>2</sub> (DPFN)(N <sub>3</sub> )](NTf <sub>2</sub> ) | AN455_sq           |
| Empirical formula                 | C40 H36 Cu2 F8 N10 O6 S2                                     |                    |
| Formula weight                    | 1095.99                                                      |                    |
| Temperature                       | 100(2) K                                                     |                    |
| Wavelength                        | 0.7288 Å                                                     |                    |
| Crystal system                    | Monoclinic                                                   |                    |
| Space group                       | C2/c                                                         |                    |
| Unit cell dimensions              | a = 15.4030(5) Å                                             | α = 90°.           |
|                                   | b = 11.8625(4) Å                                             | β = 105.5322(11)°. |
|                                   | c = 24.8301(8) Å                                             | γ = 90°.           |
| Volume                            | 4371.2(2) Å <sup>3</sup>                                     |                    |
| Z                                 | 4                                                            |                    |
| Density (calculated)              | 1.665 Mg/m <sup>3</sup>                                      |                    |
| Absorption coefficient            | 1.243 mm <sup>-1</sup>                                       |                    |
| F(000)                            | 2224                                                         |                    |
| Crystal size                      | 0.120 x 0.060 x 0.060 mm <sup>3</sup>                        |                    |
| Theta range for data collection   | 2.254 to 34.136°.                                            |                    |
| Index ranges                      | -23 ≤ h ≤ 22, -18 ≤ k ≤ 18, -38 ≤ l ≤ 38                     |                    |
| Reflections collected             | 45408                                                        |                    |
| Independent reflections           | 8312 [R(int) = 0.0544]                                       |                    |
| Completeness to theta = 25.930°   | 99.7 %                                                       |                    |
| Absorption correction             | Semi-empirical from equivalents                              |                    |
| Max. and min. transmission        | 0.929 and 0.836                                              |                    |
| Refinement method                 | Full-matrix least-squares on F <sup>2</sup>                  |                    |
| Data / restraints / parameters    | 8312 / 0 / 332                                               |                    |
| Goodness-of-fit on F <sup>2</sup> | 1.034                                                        |                    |
| Final R indices [I > 2σ(I)]       | R1 = 0.0348, wR2 = 0.0868                                    |                    |
| R indices (all data)              | R1 = 0.0465, wR2 = 0.0930                                    |                    |
| Extinction coefficient            | n/a                                                          |                    |
| Largest diff. peak and hole       | 0.617 and -0.463 e.Å <sup>-3</sup>                           |                    |

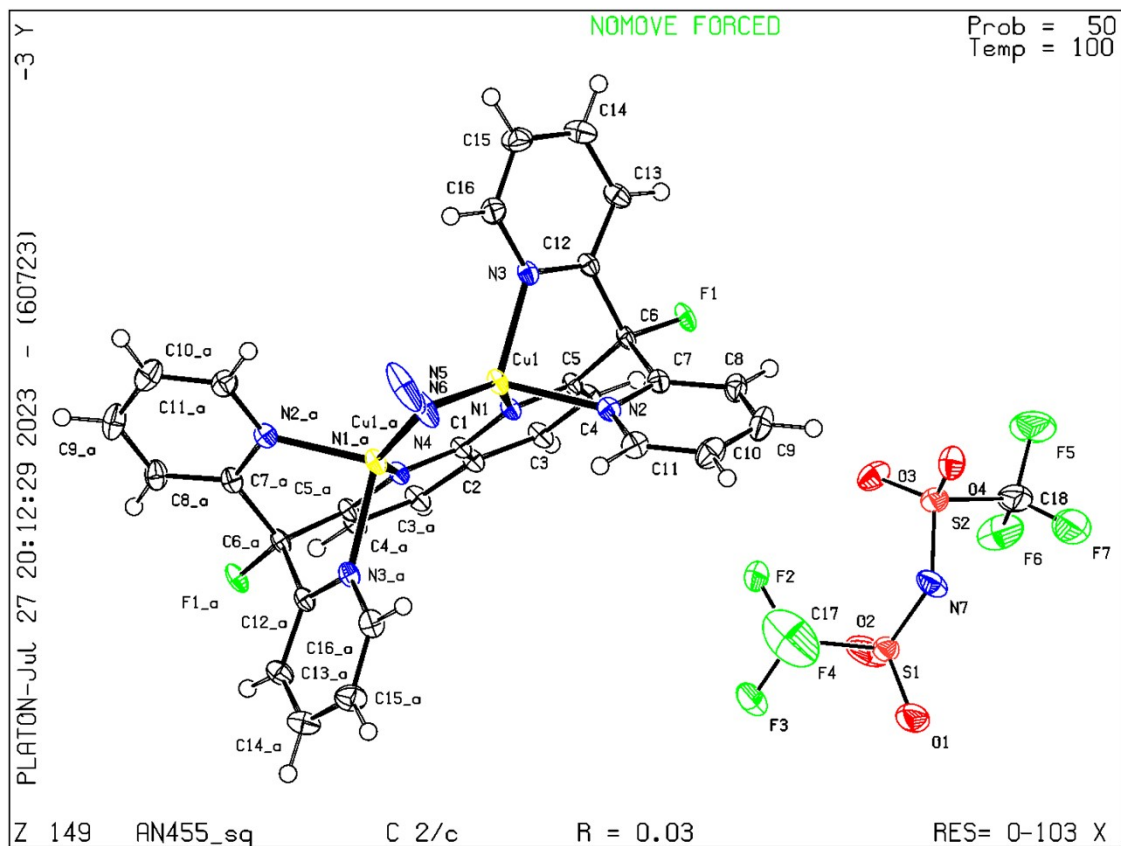

**Complex 3**

|                                   |                                                              |                 |
|-----------------------------------|--------------------------------------------------------------|-----------------|
| Identification code               | (NBu <sub>4</sub> )[Cu <sub>2</sub> (NBDA)(N <sub>3</sub> )] | twin5           |
| Empirical formula                 | C104 H158 Cu4 N16 O5                                         |                 |
| Formula weight                    | 1966.61                                                      |                 |
| Temperature                       | 100(2) K                                                     |                 |
| Wavelength                        | 0.7288 Å                                                     |                 |
| Crystal system                    | Triclinic                                                    |                 |
| Space group                       | P-1                                                          |                 |
| Unit cell dimensions              | a = 14.6398(12) Å                                            | α = 62.392(4)°. |
|                                   | b = 20.0226(18) Å                                            | β = 86.684(4)°. |
|                                   | c = 21.2387(19) Å                                            | γ = 86.526(4)°. |
| Volume                            | 5503.5(9) Å <sup>3</sup>                                     |                 |
| Z                                 | 2                                                            |                 |
| Density (calculated)              | 1.187 Mg/m <sup>3</sup>                                      |                 |
| Absorption coefficient            | 0.874 mm <sup>-1</sup>                                       |                 |
| F(000)                            | 2100                                                         |                 |
| Crystal size                      | 0.120 x 0.120 x 0.040 mm <sup>3</sup>                        |                 |
| Theta range for data collection   | 1.430 to 23.207°.                                            |                 |
| Index ranges                      | -15 ≤ h ≤ 15,      -18 ≤ k ≤ 21,<br>0 ≤ l ≤ 22               |                 |
| Reflections collected             | 25195                                                        |                 |
| Independent reflections           | 10717 [R(int) = 0.0617]                                      |                 |
| Completeness to theta = 23.207°   | 73.3 %                                                       |                 |
| Absorption correction             | Semi-empirical from equivalents                              |                 |
| Max. and min. transmission        | 0.966 and 0.626                                              |                 |
| Refinement method                 | Full-matrix least-squares on F <sup>2</sup>                  |                 |
| Data / restraints / parameters    | 10717 / 245 / 1183                                           |                 |
| Goodness-of-fit on F <sup>2</sup> | 1.030                                                        |                 |
| Final R indices [I > 2σ(I)]       | R1 = 0.0795, wR2 = 0.2090                                    |                 |
| R indices (all data)              | R1 = 0.1034, wR2 = 0.2291                                    |                 |
| Extinction coefficient            | n/a                                                          |                 |
| Largest diff. peak and hole       | 0.755 and -0.849 e.Å <sup>-3</sup>                           |                 |

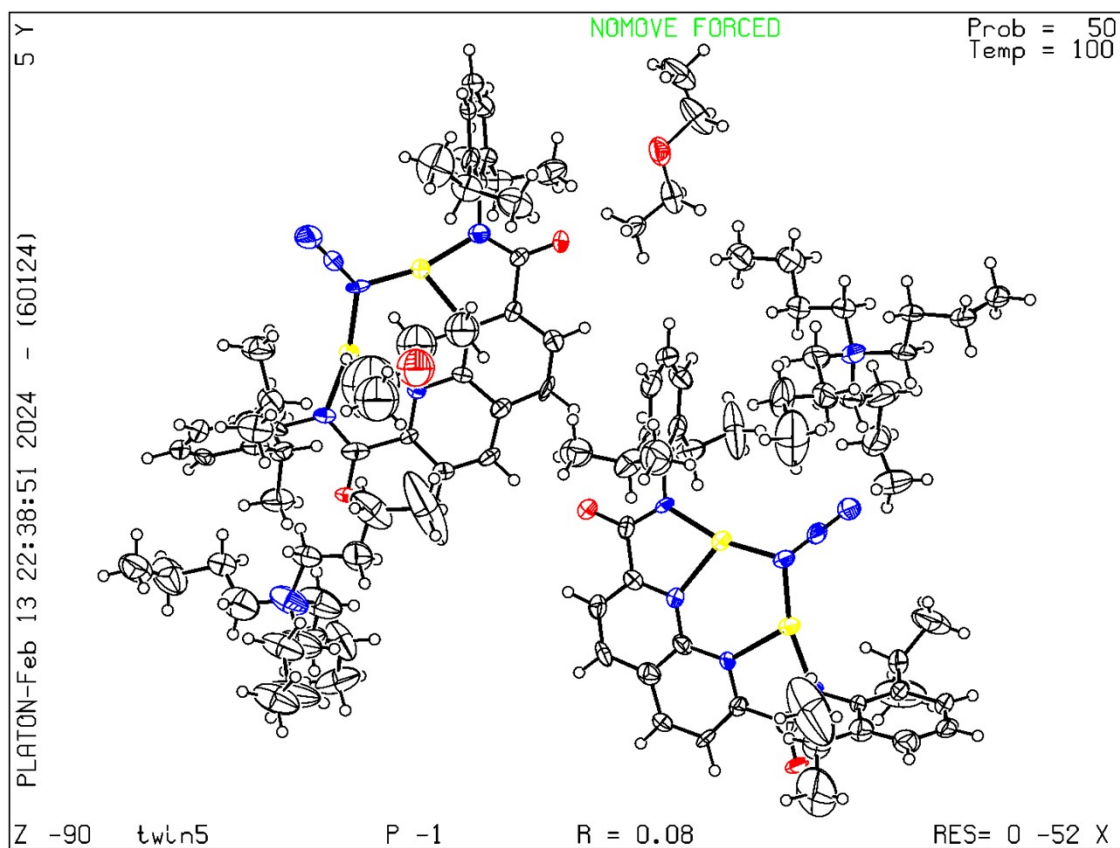

Notes on refinement:

- There is a solvent void in the structure which contains Q1 and Q2, 1.87 and 1.05 respectively, and symmetry generated version too. They do not fit the geometry of either ether or benzene and were left unmodelled.

**Complex 4**

|                                   |                                                 |                   |
|-----------------------------------|-------------------------------------------------|-------------------|
| Identification code               | [Cu <sub>2</sub> (NBDA)(XylylNC) <sub>2</sub> ] | twin5             |
| Empirical formula                 | C116.40 H139.40 Cu4 N12<br>O6.50                |                   |
| Formula weight                    | 2064.75                                         |                   |
| Temperature                       | 100(2) K                                        |                   |
| Wavelength                        | 1.54184 Å                                       |                   |
| Crystal system                    | Triclinic                                       |                   |
| Space group                       | P-1                                             |                   |
| Unit cell dimensions              | a = 15.7286(2) Å                                | α = 86.084(2)°.   |
|                                   | b = 17.0404(2) Å                                | β = 76.810(2)°.   |
|                                   | c = 21.5628(6) Å                                | γ = 89.9820(10)°. |
| Volume                            | 5613.00(19) Å <sup>3</sup>                      |                   |
| Z                                 | 2                                               |                   |
| Density (calculated)              | 1.222 Mg/m <sup>3</sup>                         |                   |
| Absorption coefficient            | 1.300 mm <sup>-1</sup>                          |                   |
| F(000)                            | 2180                                            |                   |
| Crystal size                      | 0.290 x 0.220 x 0.140 mm <sup>3</sup>           |                   |
| Theta range for data collection   | 3.162 to 74.648°.                               |                   |
| Index ranges                      | -19 ≤ h ≤ 17, -21 ≤ k ≤ 21, -<br>26 ≤ l ≤ 26    |                   |
| Reflections collected             | 135790                                          |                   |
| Independent reflections           | 31939 [R(int) = 0.0546]                         |                   |
| Completeness to theta = 67.684°   | 99.9 %                                          |                   |
| Absorption correction             | Semi-empirical from<br>equivalents              |                   |
| Max. and min. transmission        | 1.00000 and 0.93562                             |                   |
| Refinement method                 | Full-matrix least-squares on<br>F <sup>2</sup>  |                   |
| Data / restraints / parameters    | 31939 / 57 / 1304                               |                   |
| Goodness-of-fit on F <sup>2</sup> | 1.043                                           |                   |
| Final R indices [I > 2σ(I)]       | R1 = 0.0789, wR2 = 0.2409                       |                   |
| R indices (all data)              | R1 = 0.0879, wR2 = 0.2499                       |                   |
| Extinction coefficient            | n/a                                             |                   |
| Largest diff. peak and hole       | 1.866 and -0.812 e.Å <sup>-3</sup>              |                   |

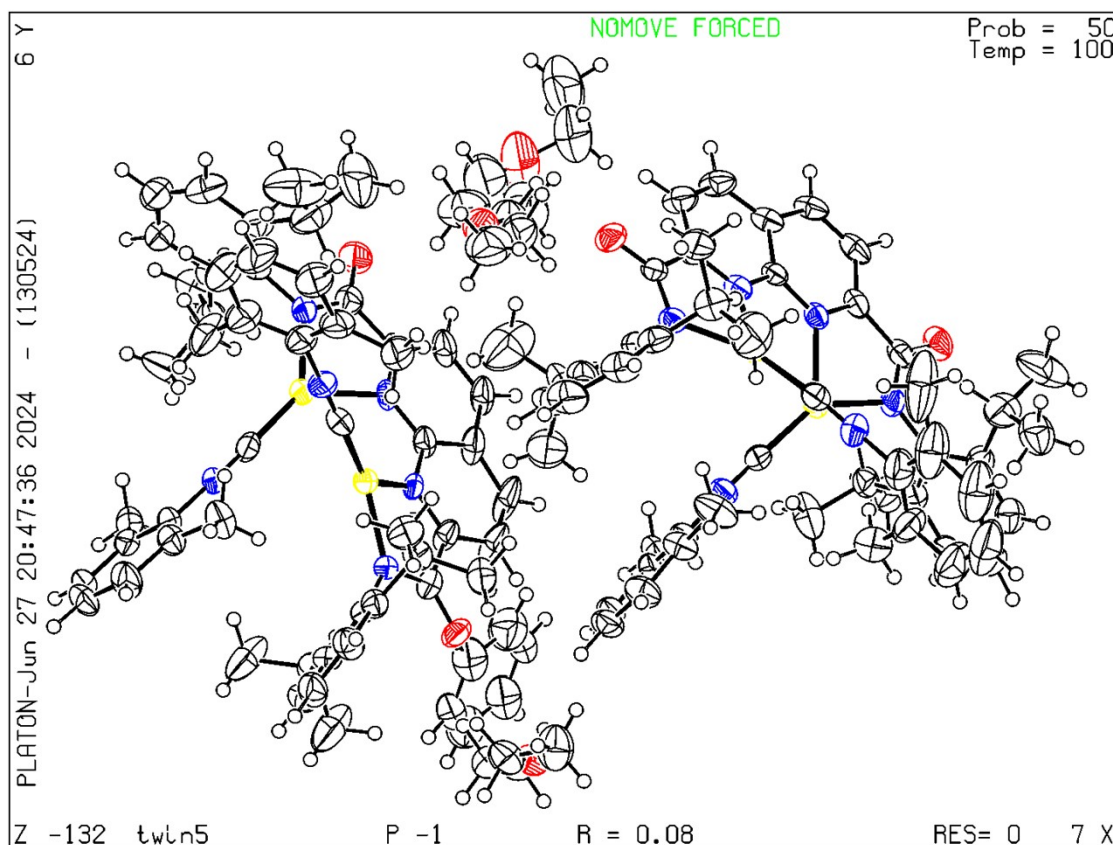

Notes on refinement:

- The crystals were collected at a synchrotron beamline and even then they were still weakly diffracting. The diffraction pattern showed twinned spots with streaking and start to run into each other around 0.93 angstrom. The data were cut at 0.93 angstroms where the  $I/I(\sigma) > 2$ , therefore on average the reflections were unobserved from this point.
- A full sphere of data was collected for this sample. The data had to be integrated as a twin and a large number of reflections were rejected for being partial overlap, this was made worse by the streaking of the reflection. A number of parameters were changed in the integration to try and improve this, such as "Minimum Common Volume %" and "Separation Factor", but no improvement could be found.

## References

- (1) Boelrijck, A. E. M.; Neenan, T. X.; Reedijk, J. Ruthenium Complexes with Naphthyridine Ligands. Synthesis, Characterization and Catalytic Activity in Oxidation Reactions. *J. Chem. Soc. - Dalton Trans.* **1997**, No. 23, 4561–4570. <https://doi.org/10.1039/a702983g>.
- (2) Tsuda, T.; Yazawa, T.; Watanabe, K.; Fujii, T.; Saegusa, T. Preparation of Thermally Stable and Soluble Mesitylcopper(I) and Its Application in Organic Synthesis. *J. Org. Chem.* **1981**, *46* (1), 192–194. <https://doi.org/10.1021/jo00314a048>.
- (3) Dolomanov, O. V.; Bourhis, L. J.; Gildea, R. J.; Howard, J. A. K.; Puschmann, H. OLEX2: A Complete Structure Solution, Refinement and Analysis Program. *J. Appl. Crystallogr.* **2009**, *42* (2), 339–341. <https://doi.org/10.1107/S0021889808042726>.
- (4) Sheldrick, G. M. Crystal Structure Refinement with SHELXL. *Acta Crystallogr. Sect. C Struct. Chem.* **2015**, *71* (Pt 1), 3–8. <https://doi.org/10.1107/S2053229614024218>.
- (5) Sheldrick, G. M. A Short History of SHELX. *Acta Crystallogr. A* **2008**, *64* (1), 112–122. <https://doi.org/10.1107/S0108767307043930>.
- (6) Bruker. APEX3 Crystallography Software Suite, 2016.
- (7) Chai, J.-D.; Head-Gordon, M. Systematic Optimization of Long-Range Corrected Hybrid Density Functionals. *J. Chem. Phys.* **2008**, *128* (8), 084106. <https://doi.org/10.1063/1.2834918>.
- (8) Chai, J. D.; Head-Gordon, M. Long-Range Corrected Hybrid Density Functionals with Damped Atom-Atom Dispersion Corrections. *Phys. Chem. Chem. Phys.* **2008**, *10* (44), 6615–6620. <https://doi.org/10.1039/b810189b>.
- (9) Weigend, F.; Ahlrichs, R. Balanced Basis Sets of Split Valence, Triple Zeta Valence and Quadruple Zeta Valence Quality for H to Rn: Design and Assessment of Accuracy. *Phys. Chem. Chem. Phys.* **2005**, *7* (18), 3297–3305. <https://doi.org/10.1039/B508541A>.
