# Supplementary material for: Dicopper(i) complexes of a binucleating, dianionic, naphthyridine bis(amide) ligand
Source: Royal Society of Chemistry journal article supplement (doi:10.1039/d5dt00034c), 2025-01-01
Supplement: d5dt00034c2.pdf [file d5dt00034c2.pdf]

[Cu<sub>2</sub>(NBDA)(μ-Cl)]<sup>-</sup> (1) (Electronic Energy: -5429.727040 Hartree)

| Atom | X (Å)    | Y (Å)    | Z (Å)    |
|------|----------|----------|----------|
| Cu1  | 1.609568 | -0.54762 | 0.109026 |
| Cu2  | -1.60971 | -0.54782 | 0.109048 |
| Cl3  | 0        | -1.99778 | 0.450409 |
| O4   | -4.65319 | 2.085957 | -0.41639 |
| O5   | 4.653263 | 2.085609 | -0.4175  |
| N6   | -1.15157 | 1.624848 | -0.36866 |
| N7   | 1.151618 | 1.624788 | -0.3688  |
| N8   | 3.414362 | 0.17188  | -0.06588 |
| N9   | -3.41436 | 0.171971 | -0.06604 |
| C10  | 0.000049 | 3.689642 | -0.8487  |
| C11  | 5.181284 | -0.66548 | 1.393316 |
| C12  | 4.375012 | -1.36224 | -2.27561 |
| H13  | 3.329958 | -1.09447 | -2.10651 |
| C14  | 5.0309   | -1.43825 | -0.91205 |
| C15  | -3.59321 | 1.459174 | -0.32029 |
| C16  | 0.000026 | 2.314644 | -0.52932 |
| C17  | 4.561409 | -0.63132 | 0.135336 |
| C18  | 6.264456 | -1.51372 | 1.582288 |
| H19  | 6.750185 | -1.55381 | 2.549733 |
| C20  | 2.297923 | 2.243296 | -0.51039 |
| C21  | 3.593259 | 1.458981 | -0.32072 |
| C22  | -2.29786 | 2.243422 | -0.51013 |
| C23  | 4.633207 | 0.163917 | 2.537762 |
| H24  | 4.130864 | 1.025833 | 2.100827 |
| C25  | -4.56131 | -0.63124 | 0.135557 |
| C26  | 6.118604 | -2.27117 | -0.68085 |
| H27  | 6.490799 | -2.90034 | -1.47999 |
| C28  | -2.39202 | 3.615966 | -0.8285  |
| H29  | -3.38001 | 4.042179 | -0.92377 |
| C30  | 6.736266 | -2.313   | 0.556041 |
| H31  | 7.583065 | -2.9686  | 0.720915 |
| C32  | -1.24722 | 4.331404 | -0.99711 |
| C33  | 2.392123 | 3.615849 | -0.82876 |
| C34  | -4.63172 | 0.163098 | 2.538344 |
| H35  | -4.12863 | 1.024579 | 2.101428 |
| C36  | -5.18042 | -0.66586 | 1.393882 |
| C37  | 1.247344 | 4.331344 | -0.99724 |
| C38  | -5.03146 | -1.4378  | -0.91186 |
| C39  | -6.73589 | -2.3131  | 0.556994 |
| H40  | -7.58255 | -2.96881 | 0.72214  |
| C41  | -6.26346 | -1.5142  | 1.583228 |
| H42  | -6.74855 | -1.55468 | 2.550987 |
| C43  | 3.5869   | -0.63825 | 3.31639  |
| H44  | 2.785339 | -0.98024 | 2.658589 |

|     |          |          |          |
|-----|----------|----------|----------|
| H45 | 3.141087 | -0.03163 | 4.108952 |
| H46 | 4.044345 | -1.51898 | 3.775525 |
| C47 | 5.006344 | -0.24159 | -3.10791 |
| H48 | 4.991141 | 0.705647 | -2.56811 |
| H49 | 4.474792 | -0.1172  | -4.05546 |
| H50 | 6.050211 | -0.48081 | -3.33183 |
| C51 | 5.713797 | 0.705351 | 3.470514 |
| H52 | 6.198337 | -0.08993 | 4.042922 |
| H53 | 5.27088  | 1.397286 | 4.190729 |
| H54 | 6.481738 | 1.239999 | 2.909276 |
| C55 | -6.11899 | -2.2708  | -0.68028 |
| H56 | -6.49169 | -2.89967 | -1.47941 |
| C57 | 4.389057 | -2.68208 | -3.04231 |
| H58 | 5.398078 | -2.9618  | -3.35659 |
| H59 | 3.782603 | -2.59232 | -3.94637 |
| H60 | 3.98198  | -3.49568 | -2.43948 |
| C61 | -4.37637 | -1.36123 | -2.27575 |
| H62 | -3.33121 | -1.09358 | -2.10713 |
| C63 | -5.00819 | -0.24024 | -3.10723 |
| H64 | -6.05219 | -0.4794  | -3.33059 |
| H65 | -4.47723 | -0.11552 | -4.05507 |
| H66 | -4.99266 | 0.706815 | -2.56712 |
| C67 | -3.58612 | -0.63993 | 3.317008 |
| H68 | -4.04426 | -1.52035 | 3.776043 |
| H69 | -3.13989 | -0.03372 | 4.109656 |
| H70 | -2.78476 | -0.9825  | 2.659245 |
| C71 | -4.39091 | -2.68074 | -3.04304 |
| H72 | -3.98349 | -3.49462 | -2.44083 |
| H73 | -3.78502 | -2.59057 | -3.94743 |
| H74 | -5.40013 | -2.96028 | -3.35682 |
| C75 | -5.71198 | 0.705433 | 3.470956 |
| H76 | -5.26856 | 1.396908 | 4.191308 |
| H77 | -6.19737 | -0.08944 | 4.043214 |
| H78 | -6.4793  | 1.240828 | 2.909592 |
| H79 | -1.27475 | 5.387254 | -1.24303 |
| H80 | 1.274892 | 5.387193 | -1.24317 |
| H81 | 3.380124 | 4.042001 | -0.92414 |

[Cu<sub>2</sub>(NBDA)(μ-N<sub>3</sub>)]<sup>-</sup> (**3**) (Electronic Energy: -5133.685005 Hartree)

| Atom | X (Å)    | Y (Å)    | Z (Å)    |
|------|----------|----------|----------|
| Cu1  | 1.564145 | 0.511927 | -0.00812 |
| Cu2  | -1.60784 | 0.478809 | -0.06378 |
| N3   | 3.362965 | -0.20755 | 0.082049 |
| N4   | -3.40266 | -0.26072 | -0.04652 |
| N5   | 1.136897 | -1.73057 | 0.115679 |
| C6   | -2.30187 | -2.38193 | 0.119979 |
| N7   | -1.1577  | -1.74766 | 0.09153  |
| C8   | -4.99348 | 1.059509 | -1.33206 |
| C9   | 0.003803 | -3.85666 | 0.23794  |
| C10  | 3.567191 | -1.51696 | 0.12739  |
| C11  | -3.59117 | -1.56913 | 0.06119  |
| C12  | -2.39076 | -3.78906 | 0.207776 |
| H13  | -3.37638 | -4.23095 | 0.226978 |
| C14  | -0.00551 | -2.44894 | 0.148349 |
| C15  | -1.2425  | -4.51843 | 0.265874 |
| H16  | -1.26793 | -5.60046 | 0.333848 |
| C17  | 6.010507 | 2.159474 | 1.106493 |
| H18  | 6.346741 | 2.679769 | 1.994766 |
| C19  | 6.677288 | 2.363983 | -0.08962 |
| H20  | 7.526611 | 3.035346 | -0.1325  |
| C21  | 4.499379 | 0.634655 | 0.02194  |
| N22  | -0.04325 | 2.780966 | -0.1873  |
| C23  | 6.247136 | 1.709921 | -1.2283  |
| H24  | 6.768033 | 1.873019 | -2.16528 |
| N25  | -0.03142 | 1.57449  | -0.10662 |
| C26  | 2.289272 | -2.34803 | 0.16856  |
| C27  | 1.258802 | -4.49986 | 0.293324 |
| H28  | 1.298824 | -5.58135 | 0.362654 |
| C29  | 2.39718  | -3.75367 | 0.258698 |
| H30  | 3.388475 | -4.18143 | 0.295775 |
| C31  | -5.19063 | 0.947678 | 1.093518 |
| C32  | 4.923029 | 1.300198 | 1.184393 |
| C33  | 5.1587   | 0.846171 | -1.1961  |
| C34  | -6.07965 | 1.925489 | -1.35852 |
| H35  | -6.43278 | 2.312338 | -2.30643 |
| C36  | -6.71938 | 2.304826 | -0.19258 |
| H37  | -7.5646  | 2.981729 | -0.2297  |
| C38  | -4.54813 | 0.570053 | -0.09505 |
| C39  | -6.27168 | 1.816364 | 1.022141 |
| H40  | -6.77523 | 2.120049 | 1.931762 |
| C41  | 4.220273 | 1.03865  | 2.500902 |
| H42  | 3.180027 | 0.80675  | 2.261592 |
| N43  | -0.05468 | 3.909372 | -0.26249 |
| C44  | -4.31535 | 0.612412 | -2.61099 |

|     |          |          |          |
|-----|----------|----------|----------|
| H45 | -3.27518 | 0.397584 | -2.35689 |
| C46 | 4.410819 | 1.138986 | -3.58936 |
| H47 | 5.308656 | 1.677785 | -3.9029  |
| H48 | 3.670289 | 1.875308 | -3.27236 |
| H49 | 4.01835  | 0.613568 | -4.4636  |
| C50 | 4.71226  | 0.148003 | -2.46448 |
| H51 | 3.782139 | -0.37221 | -2.23663 |
| C52 | -4.66901 | 0.461896 | 2.431611 |
| H53 | -4.18024 | -0.49618 | 2.259951 |
| C54 | 5.735731 | -0.90249 | -2.89969 |
| H55 | 5.378446 | -1.44743 | -3.77786 |
| H56 | 5.909071 | -1.61395 | -2.09187 |
| H57 | 6.688735 | -0.43275 | -3.16036 |
| C58 | -4.94149 | -0.69089 | -3.11736 |
| H59 | -4.94191 | -1.45538 | -2.33991 |
| H60 | -4.39591 | -1.07007 | -3.98591 |
| H61 | -5.97987 | -0.51884 | -3.41589 |
| C62 | 4.817302 | -0.19486 | 3.185864 |
| H63 | 4.818675 | -1.05574 | 2.516864 |
| H64 | 4.251893 | -0.44867 | 4.086755 |
| H65 | 5.853373 | 0.001029 | 3.477421 |
| C66 | -4.30684 | 1.673452 | -3.70841 |
| H67 | -3.90325 | 2.619511 | -3.34343 |
| H68 | -5.30863 | 1.860413 | -4.10398 |
| H69 | -3.68735 | 1.338699 | -4.54344 |
| C70 | -5.76709 | 0.220732 | 3.464485 |
| H71 | -6.23874 | 1.152358 | 3.787613 |
| H72 | -5.34336 | -0.25159 | 4.353837 |
| H73 | -6.54221 | -0.43498 | 3.0647   |
| C74 | 4.214783 | 2.235392 | 3.448201 |
| H75 | 5.21379  | 2.456491 | 3.833141 |
| H76 | 3.576793 | 2.023719 | 4.309138 |
| H77 | 3.833933 | 3.13145  | 2.955088 |
| C78 | -3.61427 | 1.432491 | 2.970102 |
| H79 | -2.79995 | 1.560945 | 2.254039 |
| H80 | -3.18836 | 1.065139 | 3.907386 |
| H81 | -4.05737 | 2.414532 | 3.156424 |
| O82 | -4.6565  | -2.19021 | 0.122273 |
| O83 | 4.640839 | -2.12753 | 0.143049 |

[Cu<sub>2</sub>(NBDA)(XylNC)<sub>2</sub>]<sup>-</sup> (**4**) (Electronic Energy: -5775.650169 Hartree)

| Atom | X (Å)    | Y (Å)    | Z (Å)    |
|------|----------|----------|----------|
| Cu1  | 1.27382  | -0.44342 | -0.99628 |
| Cu2  | -1.32854 | -0.88861 | 0.631094 |
| O3   | 4.606381 | -2.65534 | -1.47643 |
| N4   | 3.203953 | -0.88375 | -0.96895 |
| N5   | 1.137162 | -2.52579 | -0.91823 |
| N6   | 0.567466 | 0.724343 | 2.319584 |
| N7   | -1.09125 | -2.68794 | -0.42231 |
| N8   | -3.22032 | -1.28807 | 0.238091 |
| O9   | -4.54435 | -3.1778  | 0.040657 |
| C10  | 3.512191 | -2.14467 | -1.25128 |
| C11  | 4.216447 | 0.074076 | -0.73628 |
| N12  | -0.64698 | 1.820536 | -1.48392 |
| C13  | 4.402951 | 1.112051 | -1.66758 |
| C14  | 2.287692 | -3.05898 | -1.25725 |
| C15  | 1.50286  | 1.196608 | 4.458694 |
| C16  | 1.465448 | 1.449544 | 3.08517  |
| C17  | 2.309139 | 2.359975 | 2.444031 |
| C18  | 4.932866 | 0.066037 | 0.472005 |
| C19  | -0.16743 | 0.084889 | 1.689774 |
| C20  | -4.27929 | -0.38163 | 0.480432 |
| C21  | 0.058304 | -4.66287 | -1.17778 |
| C22  | 2.439875 | 1.895355 | 5.204412 |
| C23  | -2.22308 | -3.3512  | -0.38938 |
| C24  | 5.808336 | 1.114552 | 0.733225 |
| C25  | -4.70167 | -0.12681 | 1.790182 |
| C26  | 0.579875 | 0.191969 | 5.078965 |
| C27  | 3.230005 | 3.030217 | 3.236299 |
| C28  | -3.47678 | -2.57213 | 0.007312 |
| C29  | 5.981582 | 2.149893 | -0.16455 |
| C30  | 0.034941 | -3.29847 | -0.8394  |
| C31  | -2.30317 | -4.71434 | -0.73633 |
| C32  | 3.684224 | 1.068628 | -3.00076 |
| C33  | 0.077618 | 0.929489 | -1.32023 |
| C34  | 4.799374 | -1.06219 | 1.47719  |
| C35  | 2.243208 | 2.570658 | 0.964669 |
| C36  | -1.16539 | -5.36693 | -1.11227 |
| C37  | -4.80625 | 0.355256 | -0.59725 |
| C38  | -5.64132 | 0.874142 | 2.010485 |
| C39  | 5.283142 | 2.139956 | -1.35993 |
| C40  | -4.13596 | -0.89858 | 2.964308 |
| C41  | -6.15934 | 1.610545 | 0.96297  |
| C42  | 3.296986 | 2.800536 | 4.599686 |
| C43  | -1.47278 | 3.454435 | -3.00389 |
| C44  | -1.49557 | 2.887539 | -1.72698 |

|     |          |          |          |
|-----|----------|----------|----------|
| C45 | 3.460808 | 2.437106 | -3.63692 |
| C46 | -4.36072 | 0.061789 | -2.01731 |
| C47 | 1.302961 | -5.21466 | -1.55636 |
| C48 | 4.41899  | 0.130966 | -3.96399 |
| C49 | 2.414795 | -4.42429 | -1.58047 |
| C50 | -0.55717 | 2.920089 | -4.06295 |
| C51 | -5.22733 | -1.65364 | 3.722402 |
| C52 | -5.74197 | 1.345495 | -0.33088 |
| C53 | -2.33809 | 3.325531 | -0.70239 |
| C54 | -3.33462 | 0.017413 | 3.89178  |
| C55 | -3.19306 | 4.965828 | -2.25189 |
| C56 | -2.34151 | 4.50787  | -3.24425 |
| C57 | -3.19014 | 4.380558 | -0.99725 |
| C58 | -2.33448 | 2.671349 | 0.643161 |
| C59 | 6.015285 | -1.99041 | 1.399878 |
| C60 | 4.591617 | -0.57068 | 2.909995 |
| C61 | -4.46959 | 1.256359 | -2.96307 |
| C62 | -5.14132 | -1.12315 | -2.59889 |
| H63 | -1.1863  | -6.41932 | -1.37019 |
| H64 | 1.360232 | -6.26463 | -1.81865 |
| H65 | 3.395937 | -4.79193 | -1.84456 |
| H66 | 2.501241 | 1.719743 | 6.271    |
| H67 | 6.368258 | 1.117679 | 1.660702 |
| H68 | 0.724612 | 0.150108 | 6.156969 |
| H69 | 0.758936 | -0.8055  | 4.671003 |
| H70 | -0.46555 | 0.436549 | 4.880383 |
| H71 | 3.911775 | 3.728002 | 2.76751  |
| H72 | 6.668233 | 2.95724  | 0.058445 |
| H73 | -3.26976 | -5.19442 | -0.68313 |
| H74 | 2.69757  | 0.634377 | -2.82104 |
| H75 | 3.916594 | -1.6417  | 1.20408  |
| H76 | 2.457328 | 1.642256 | 0.43251  |
| H77 | 2.98175  | 3.302533 | 0.643721 |
| H78 | 1.252194 | 2.908773 | 0.653412 |
| H79 | -5.97262 | 1.079707 | 3.022049 |
| H80 | 5.4341   | 2.947206 | -2.06481 |
| H81 | -3.44752 | -1.64288 | 2.565406 |
| H82 | -6.89153 | 2.386342 | 1.150267 |
| H83 | 4.027977 | 3.329095 | 5.197916 |
| H84 | 4.396721 | 2.895577 | -3.96375 |
| H85 | 2.972087 | 3.12644  | -2.94415 |
| H86 | 2.829716 | 2.334941 | -4.52252 |
| H87 | -3.30768 | -0.22926 | -1.96047 |
| H88 | 5.406942 | 0.533698 | -4.20138 |
| H89 | 3.862574 | 0.021219 | -4.89822 |
| H90 | 4.560397 | -0.85602 | -3.52271 |

|      |          |          |          |
|------|----------|----------|----------|
| H91  | 0.48597  | 2.954675 | -3.74177 |
| H92  | -0.65225 | 3.496416 | -4.9814  |
| H93  | -0.78967 | 1.876664 | -4.28811 |
| H94  | -5.94908 | -0.96779 | 4.172551 |
| H95  | -4.79124 | -2.25207 | 4.525728 |
| H96  | -5.76569 | -2.32072 | 3.048498 |
| H97  | -6.15083 | 1.927722 | -1.14651 |
| H98  | -3.97357 | 0.77669  | 4.349077 |
| H99  | -2.5459  | 0.533517 | 3.339053 |
| H100 | -2.87099 | -0.55892 | 4.696423 |
| H101 | -3.87007 | 5.784032 | -2.46108 |
| H102 | -2.35402 | 4.967484 | -4.22441 |
| H103 | -3.86799 | 4.73387  | -0.23095 |
| H104 | -2.56619 | 1.608365 | 0.560098 |
| H105 | -3.08644 | 3.116606 | 1.291626 |
| H106 | -1.35804 | 2.760611 | 1.124817 |
| H107 | 6.921956 | -1.45397 | 1.692801 |
| H108 | 6.144608 | -2.36922 | 0.387178 |
| H109 | 5.892636 | -2.8386  | 2.078022 |
| H110 | 5.471832 | -0.04923 | 3.292059 |
| H111 | 4.405943 | -1.41946 | 3.572034 |
| H112 | 3.745478 | 0.1115   | 2.983791 |
| H113 | -5.5109  | 1.48137  | -3.2057  |
| H114 | -3.96515 | 1.029085 | -3.90471 |
| H115 | -4.02171 | 2.157202 | -2.54513 |
| H116 | -6.19435 | -0.85185 | -2.71189 |
| H117 | -5.09513 | -1.99951 | -1.95494 |
| H118 | -4.75395 | -1.38825 | -3.586   |

[Cu<sub>2</sub>(DPFN)(μ-N<sub>3</sub>)]<sup>+</sup> (**2**) (Electronic Energy: -5128.807354 Hartree)

| Atom | X (Å)    | Y (Å)    | Z (Å)    |
|------|----------|----------|----------|
| Cu1  | -1.36748 | 0.642934 | 0.656284 |
| C2   | 0.015302 | -1.53031 | -1.16934 |
| C3   | 0.01922  | -2.64913 | -2.02164 |
| C4   | -1.2189  | -3.17338 | -2.43618 |
| C5   | -2.36868 | -2.58701 | -2.01232 |
| C6   | -2.27881 | -1.46214 | -1.16373 |
| C7   | -3.57819 | -0.79267 | -0.6997  |
| C8   | -3.80544 | -0.95247 | 0.810603 |
| C9   | -4.95226 | -1.56696 | 1.285867 |
| C10  | -5.11496 | -1.67943 | 2.656137 |
| C11  | -4.14311 | -1.1744  | 3.500209 |
| C12  | -3.03526 | -0.56633 | 2.939327 |
| C13  | -3.66876 | 0.67708  | -1.13821 |
| C14  | -4.63337 | 1.087043 | -2.04284 |
| C15  | -4.67997 | 2.427508 | -2.38651 |
| C16  | -3.77642 | 3.309185 | -1.8174  |
| C17  | -2.84651 | 2.809594 | -0.92397 |
| F18  | -4.61446 | -1.44999 | -1.33255 |
| N19  | -1.13738 | -0.95862 | -0.75534 |
| N20  | -2.8695  | -0.46296 | 1.621975 |
| N21  | -2.79273 | 1.519545 | -0.59909 |
| N22  | -0.01365 | 1.700331 | 1.628755 |
| N23  | -0.04873 | 2.850796 | 1.96062  |
| N24  | -0.09537 | 3.932821 | 2.303475 |
| C25  | 1.261082 | -3.18213 | -2.4139  |
| C26  | 2.407057 | -2.60573 | -1.96842 |
| C27  | 2.310453 | -1.48216 | -1.11851 |
| C28  | 3.603805 | -0.83657 | -0.61426 |
| C29  | 3.758904 | 0.616225 | -1.08495 |
| C30  | 4.822913 | 0.977901 | -1.89438 |
| C31  | 4.929874 | 2.302087 | -2.28243 |
| C32  | 3.987547 | 3.216356 | -1.8492  |
| C33  | 2.963972 | 2.770596 | -1.03405 |
| C34  | 3.757498 | -0.95931 | 0.905408 |
| C35  | 4.828556 | -1.64057 | 1.455928 |
| C36  | 4.919436 | -1.70526 | 2.835374 |
| C37  | 3.950353 | -1.09039 | 3.610626 |
| C38  | 2.918686 | -0.42734 | 2.971282 |
| F39  | 4.648511 | -1.54772 | -1.1762  |
| N40  | 1.167413 | -0.96708 | -0.73284 |
| N41  | 2.850495 | 1.494034 | -0.66551 |
| N42  | 2.824382 | -0.36795 | 1.645018 |
| Cu43 | 1.303652 | 0.748877 | 0.546756 |
| H44  | -5.42245 | 2.775903 | -3.09182 |



|     |          |          |          |
|-----|----------|----------|----------|
| H45 | -3.78957 | 4.362742 | -2.05696 |
| H46 | -2.12459 | 3.45224  | -0.43723 |
| H47 | -5.33917 | 0.388517 | -2.4632  |
| H48 | -5.70494 | -1.94202 | 0.611651 |
| H49 | -5.99772 | -2.15953 | 3.056304 |
| H50 | -4.23884 | -1.24453 | 4.574109 |
| H51 | -2.24991 | -0.14067 | 3.550037 |
| H52 | -3.33127 | -2.96457 | -2.3141  |
| H53 | -1.24367 | -4.03248 | -3.09438 |
| H54 | 1.291422 | -4.04608 | -3.06544 |
| H55 | 3.37238  | -2.98792 | -2.25529 |
| H56 | 5.556397 | 0.250742 | -2.20403 |
| H57 | 5.747485 | 2.612573 | -2.91903 |
| H58 | 4.043885 | 4.257897 | -2.131   |
| H59 | 2.213894 | 3.448063 | -0.64821 |
| H60 | 5.573837 | -2.10118 | 0.826452 |
| H61 | 5.742787 | -2.23248 | 3.298312 |
| H62 | 3.991199 | -1.12288 | 4.689893 |
| H63 | 2.134698 | 0.076793 | 3.522045 |

[Cu<sub>2</sub>(py-np)( $\mu$ -Cl)<sub>2</sub>] (Electronic Energy: -5113.938203 Hartree)

| Atom | X (Å)    | Y (Å)    | Z (Å)    |
|------|----------|----------|----------|
| Cu1  | 1.292681 | -1.27099 | -0.00155 |
| Cl2  | -0.00055 | -1.99532 | -1.82939 |
| N3   | 1.143478 | 0.961448 | -0.00021 |
| N4   | 3.248675 | -0.63487 | 0.000339 |
| C5   | 0        | 1.673905 | -4E-06   |
| C6   | 0        | 3.081101 | 0.000021 |
| C7   | 1.251979 | 3.730517 | -6.8E-05 |
| H8   | 1.294945 | 4.81309  | -6E-06   |
| C9   | 2.393977 | 2.988581 | -0.0002  |
| H10  | 3.354492 | 3.481485 | -0.00018 |
| C11  | 2.299317 | 1.573754 | -0.00028 |
| C12  | 3.495546 | 0.683532 | -0.00024 |
| C13  | 4.794486 | 1.175944 | -0.0006  |
| H14  | 4.984621 | 2.238977 | -0.00135 |
| C15  | 5.856904 | 0.290832 | -6.9E-05 |
| H16  | 6.874388 | 0.659245 | -0.00036 |
| C17  | 5.594383 | -1.06694 | 0.000853 |
| H18  | 6.39104  | -1.79771 | 0.001437 |
| C19  | 4.274929 | -1.48189 | 0.000962 |
| H20  | 4.018999 | -2.5337  | 0.001517 |
| N21  | -1.14348 | 0.961448 | 0.000178 |
| N22  | -3.24867 | -0.63487 | -0.00034 |
| C23  | -1.25198 | 3.730517 | 0.000138 |
| H24  | -1.29495 | 4.813091 | 0.000121 |
| C25  | -2.39398 | 2.988581 | 0.000243 |
| H26  | -3.35449 | 3.481485 | 0.000249 |
| C27  | -2.29932 | 1.573755 | 0.000266 |
| C28  | -3.49555 | 0.683532 | 0.000187 |
| C29  | -4.79449 | 1.175945 | 0.000461 |
| H30  | -4.98462 | 2.238978 | 0.001154 |
| C31  | -5.8569  | 0.290833 | -0.0001  |
| H32  | -6.87439 | 0.659247 | 0.000114 |
| C33  | -5.59438 | -1.06694 | -0.00097 |
| H34  | -6.39104 | -1.79771 | -0.00157 |
| C35  | -4.27493 | -1.48189 | -0.00099 |
| H36  | -4.019   | -2.5337  | -0.0015  |
| Cu37 | -1.29268 | -1.27099 | 0.0016   |
| Cl38 | 0.000552 | -1.99524 | 1.829464 |

[Cu<sub>2</sub>(DPFN)(μ-Cl)]<sup>+</sup> (Electronic Energy: -5424.860625 Hartree)

| Atom | X (Å)    | Y (Å)    | Z (Å)    |
|------|----------|----------|----------|
| C1   | -2.29891 | -0.00091 | 1.796516 |
| C2   | -2.39105 | -0.00265 | 3.204795 |
| H3   | -3.35624 | -0.00328 | 3.684348 |
| C4   | -1.24158 | -0.00346 | 3.932285 |
| H5   | -1.26926 | -0.00479 | 5.01504  |
| C6   | -6.1E-05 | -0.00252 | 3.268113 |
| C7   | 1.241452 | -0.0031  | 3.932299 |
| H8   | 1.269127 | -0.00442 | 5.015055 |
| C9   | 2.390921 | -0.00198 | 3.204817 |
| H10  | 3.356107 | -0.00231 | 3.684384 |
| C11  | 2.298792 | -0.00034 | 1.796539 |
| C12  | -4.9E-05 | -0.00085 | 1.861058 |
| C13  | -3.59495 | -2.7E-05 | 0.97188  |
| C14  | -3.73673 | 1.272692 | 0.126124 |
| C15  | -4.79937 | 2.139201 | 0.324285 |
| H16  | -5.54054 | 1.941333 | 1.082721 |
| C17  | -4.88661 | 3.262862 | -0.48153 |
| H18  | -5.70573 | 3.958304 | -0.35283 |
| C19  | -3.92289 | 3.48116  | -1.45    |
| H20  | -3.96197 | 4.343626 | -2.10035 |
| C21  | -2.89794 | 2.562006 | -1.57509 |
| H22  | -2.11826 | 2.673232 | -2.31892 |
| C23  | -3.73754 | -1.27194 | 0.125052 |
| C24  | -4.80123 | -2.13751 | 0.321664 |
| H25  | -5.54277 | -1.93958 | 1.079718 |
| C26  | -4.88897 | -3.26036 | -0.48523 |
| H27  | -5.70889 | -3.9551  | -0.35778 |
| C28  | -3.92473 | -3.47879 | -1.45317 |
| H29  | -3.96423 | -4.34064 | -2.10431 |
| C30  | -2.89874 | -2.56058 | -1.57668 |
| H31  | -2.11856 | -2.67188 | -2.31998 |
| C32  | 3.594849 | 0.00072  | 0.971953 |
| C33  | 3.736343 | 1.273155 | 0.12574  |
| C34  | 4.798765 | 2.14001  | 0.323545 |
| H35  | 5.539967 | 1.942668 | 1.082084 |
| C36  | 4.885734 | 3.263332 | -0.48277 |
| H37  | 5.704679 | 3.959031 | -0.35437 |
| C38  | 3.921965 | 3.480967 | -1.45136 |
| H39  | 3.960863 | 4.343154 | -2.10209 |
| C40  | 2.897233 | 2.561516 | -1.57605 |
| H41  | 2.117504 | 2.672222 | -2.31991 |
| C42  | 3.737871 | -1.27146 | 0.125578 |
| C43  | 4.801805 | -2.13663 | 0.32261  |
| H44  | 5.543227 | -1.93817 | 1.080642 |

|      |          |          |          |
|------|----------|----------|----------|
| C45  | 4.889969 | -3.25978 | -0.48382 |
| H46  | 5.710086 | -3.95421 | -0.35602 |
| C47  | 3.92587  | -3.47888 | -1.45176 |
| H48  | 3.965675 | -4.34098 | -2.10254 |
| C49  | 2.899607 | -2.56104 | -1.57571 |
| H50  | 2.119531 | -2.6729  | -2.31903 |
| N51  | -1.15594 | -9.5E-05 | 1.152694 |
| N52  | 1.155834 | 0.000124 | 1.152699 |
| N53  | -2.8082  | 1.484594 | -0.79958 |
| N54  | -2.80854 | -1.48398 | -0.80011 |
| N55  | 2.807778 | 1.484424 | -0.80006 |
| N56  | 2.809    | -1.48415 | -0.79958 |
| F57  | -4.63938 | -6.4E-05 | 1.872921 |
| F58  | 4.639227 | 0.001323 | 1.873062 |
| Cl59 | -0.00016 | -0.00272 | -2.83738 |
| Cu60 | -1.29953 | 0.000262 | -0.99963 |
| Cu61 | 1.299717 | -0.00046 | -0.99992 |
